1 **Transposable element landscape in *Drosophila* populations selected**  
2 **for longevity**

3 Daniel K. Fabian<sup>1,2\*</sup>, Handan Melike Dönertaş<sup>1</sup>, Matías Fuentealba<sup>1,2</sup>, Linda  
4 Partridge<sup>2,3</sup> and Janet M. Thornton<sup>1</sup>

5

6 <sup>1</sup> European Molecular Biology Laboratory, European Bioinformatics Institute,  
7 Wellcome Genome Campus, Hinxton, UK

8 <sup>2</sup> Institute of Healthy Ageing, Department of Genetics, Evolution and Environment,  
9 University College London, London, UK

10 <sup>3</sup> Max Planck Institute for Biology of Ageing, Cologne, Germany

11

12 \* Corresponding author

13 E-mail: [daniel.fabian@ebi.ac.uk](mailto:daniel.fabian@ebi.ac.uk)

14

15

16

17

18

19

20

21

22

23

24

25

## 26 **ABSTRACT**

27 Transposable elements (TEs) inflict numerous negative effects on health and fitness  
28 as they replicate by integrating into new regions of the host genome. Even though  
29 organisms utilize powerful mechanisms to demobilize TEs, transposons become  
30 increasingly derepressed during aging. The rising TE activity causes genomic  
31 instability and was suggested to be involved in age-dependent neurodegenerative  
32 diseases, inflammation and the determination of lifespan. It is therefore conceivable  
33 that long-lived individuals have improved TE silencing mechanisms and consequently  
34 fewer genomic insertions and a reduced TE expression relative to their shorter-lived  
35 counterparts. Here, we test this hypothesis by performing the first analysis of genome-  
36 wide insertions and expression of TEs in populations of *Drosophila melanogaster*  
37 selected for longevity through late-life reproduction for 50-170 generations from four  
38 independent studies. Surprisingly, we found that TE families were generally more  
39 abundant in long-lived populations compared to non-selected controls. Despite  
40 simulations showed that this was not expected under neutrality, we found little  
41 evidence for selection driving TE abundance differences. Additional RNA-seq analysis  
42 revealed only few differentially expressed TEs whereas reducing TE expression might  
43 be more important than regulating genomic insertions. We further find limited evidence  
44 of parallel selection on genes related to TE regulation and transposition. However,  
45 telomeric TEs were genomically and transcriptionally more abundant in long-lived flies,  
46 suggesting improved telomere maintenance as a promising TE-mediated mechanism  
47 prolonging lifespan. Our results provide a novel viewpoint proposing that reproduction  
48 at old age increases the opportunity of TEs to be passed on to the next generation  
49 with little impact on longevity.

50

51

52

53

54

55

56

57

58

## 59 INTRODUCTION

60  
61 Aging, also known as senescence, is an evolutionary conserved process described as  
62 the progressive loss of physiological homeostasis starting from maturity with disease  
63 promotion, decline in phenotypic function, and increased chance of mortality over time  
64 as a consequence (Fabian and Flatt 2011; Flatt and Heyland 2011; López-Otín et al.  
65 2013). At the molecular level, studies of loss-of-function mutations in model organisms  
66 such as yeast, *Caenorhabditis elegans*, *Drosophila melanogaster*, and mice have  
67 successfully identified key pathways underlying aging and longevity including the  
68 conserved insulin/insulin-like growth factor signaling (IIS) and target of rapamycin  
69 (TOR) nutrient-sensing network (Piper et al. 2008; Fontana et al. 2010; Gems and  
70 Partridge 2013; Pan and Finkel 2017). More recently, sequencing of whole genomes,  
71 transcriptomes, and epigenomes corroborated that aging has a complex genetic basis  
72 involving many genes and is accompanied by changes across a broad range of  
73 interconnected molecular functions (López-Otín et al. 2013).

74  
75 While there has been a predominant focus on identifying the links between genes and  
76 phenotypes correlated with aging, the role of transposable elements (TEs) in  
77 senescence and longevity has received less attention even though their discovery by  
78 Barbara McClintock goes back to more than half a century ago (McClintock 1950).  
79 TEs, or transposons, are selfish genetic elements that replicate and move within  
80 genomes of their hosts. In eukaryotes they typically constitute a considerable portion  
81 of the genome with estimates around ~3% in yeast, ~20% in *D. melanogaster*, ~70%  
82 in humans and ~85% in maize (Quesneville et al. 2005; Schnable et al. 2009; de  
83 Koning et al. 2011; Carr et al. 2012). To date, several thousand TE families broadly  
84 classified into DNA-transposons and retrotransposons multiplying via RNA  
85 intermediates have been identified and are known to vary hugely in their  
86 transpositional mobility (Jurka et al. 2011; Deniz et al. 2019). For instance, only a small  
87 fraction of L1 retrotransposons are responsible for most of the transposition events in  
88 the human genome, while the vast majority of L1s and other TE families have been  
89 inactivated through the accumulation of structural and point mutations over  
90 evolutionary time scales (Brouha et al. 2003).

91

92 For a long time, transposons were unfairly deemed as ‘junk DNA’ that do not have any  
93 significant impact on organismal function, but a series of studies proofing TE-mediated  
94 adaptive evolution and their role in diseases initiated a paradigm shift in thinking.  
95 Nevertheless, the extent to which active transposition and immobile TEs residing in  
96 the genome contribute to host fitness are still controversial. TE mobility causes  
97 genomic instability through insertional mutagenesis, which can directly affect coding  
98 sequences of genes or modify their transcription. Typically, TE insertions into or close  
99 to genes impose negative consequences on health and have been associated with  
100 ~100 diseases in humans, including cystic fibrosis, haemophilia and cancer (Hancks  
101 and Kazazian 2012). Moreover, TE expression and translation allow the formation of  
102 toxic TE products that, for example, contribute to autoimmune diseases, whereas TE  
103 activity and replication of an increased genomic TE content might also impose  
104 metabolic costs to the host (Kaneko et al. 2011; Barrón et al. 2014; Volkman and  
105 Stetson 2014; Bogu et al. 2019).

106 On the other hand, there is mounting experimental evidence for positive selection on  
107 segregating TE insertions from multiple taxa confirming beneficial phenotypic  
108 properties including insecticide and virus resistance in *Drosophila* (Daborn et al. 2002;  
109 Magwire et al. 2011; Kuhn et al. 2014; Li et al. 2018; Rech et al. 2019). Still, recent  
110 arguments have emphasized the notion that most TE insertions are likely to be slightly  
111 deleterious or neutral with little effects on fitness, and that adaptive TEs are negligibly  
112 rare (Arkhipova 2018).

113

114 An evolutionary conserved characteristic of TEs is that their rate of transposition and  
115 expression is not constant throughout life, but rather changes during aging as  
116 demonstrated in various organisms including yeast, *D. melanogaster*, *C. elegans*,  
117 mice, and humans (Maxwell et al. 2011; Dennis et al. 2012; Solyom et al. 2012; De  
118 Cecco et al. 2013; Li et al. 2013; Chen et al. 2016; Bogu et al. 2019; De Cecco et al.  
119 2019). TEs have further been implicated in age-related neurodegenerative diseases  
120 (e.g. Krug et al. 2017; Prudencio et al. 2017; Guo et al. 2018) and might promote  
121 chronic inflammation observed during aging (Chen et al. 2014; De Cecco et al. 2019)  
122 further supporting the involvement of TEs in senescence and longevity as proposed  
123 by the emerging ‘transposable element theory of aging’. The age-related change in  
124 TE activity detected in many tissues has mainly been attributed to chromatin  
125 remodeling and the decline in repressive heterochromatin structure which is

126 commonly rich in transposable elements (Dimitri and Junakovic 1999; Wood and  
127 Helfand 2013; Chen et al. 2016; Wood et al. 2016). TEs that are not suppressed by  
128 chromatin structure are target of post-transcriptional silencing by the host RNA-  
129 interference (RNAi) machinery, mostly the piwi-interacting RNA (piRNA) pathway, that  
130 is in turn also necessary for heterochromatin formation and stability (Lippman and  
131 Martienssen 2004; Martienssen and Moazed 2015). Indeed, research has identified  
132 longevity-promoting effects of several genes involved in the RNAi machinery and  
133 heterochromatin formation (Mori et al. 2012; Wood and Helfand 2013; Wood et al.  
134 2016). Interestingly, it is possible that age-related misexpression of TEs is exclusive  
135 to the soma due to efficient post-transcriptional TE silencing mediated by the piRNA  
136 machinery in the germline (Sturm et al. 2015; Elsner et al. 2018; Erwin and Blumenstiel  
137 2019). Considering current evidence, it seems natural that longevity can be achieved  
138 through impeding TE activity and controlling the genomic content of TEs. However,  
139 whether variation in aging and lifespan within species is mediated by transposons and  
140 their role in the evolution of senescence is largely unknown.

141  
142 Here, we analyze genomes of *D. melanogaster* populations experimentally selected  
143 for increased lifespan through postponed reproduction from four independent studies  
144 to understand the role of TEs in the evolution and genomic basis of late-life  
145 performance and aging. The invertebrate *D. melanogaster* is an excellent model in  
146 this respect as it exhibits abundant genetic and phenotypic variation in fecundity and  
147 traits related to aging that can be selected for. In the present experiments, replicate  
148 populations derived from nature were subjected to a late-life breeding scheme in which  
149 only flies surviving and fertile at old age contributed to the subsequent generations,  
150 while control individuals reproduced earlier in life. At the point of whole genome  
151 sequencing, this process had continued for over 30 years with ~170 and ~150  
152 generations of selection for Carnes et al. 2015 (Carnes2015) and Fabian et al. 2018  
153 (Fabian2018), and for 58 and 50 generations for Hoedjes et al. 2019 (Hoedjes2019)  
154 and Remolina et al. 2012 (Remolina2012) enabling us to quantify differences in TE  
155 content of long- and short-term evolutionary responses. Selection for postponed  
156 senescence has resulted in phenotypic divergence of multiple fitness traits, most  
157 notably an ~8% to ~74% increase in lifespan and improved old age fecundity at the  
158 cost of reduced early reproduction (Luckinbill et al. 1984; Rose 1984; Remolina et al.  
159 2012; Carnes et al. 2015; Fabian et al. 2018; Hoedjes et al. 2019; May et al. 2019). At

160 the genome level, analysis of genetic differentiation has revealed a significant sharing  
161 in candidate genes across the four studies indicating parallel evolution (Hoedjes et al.  
162 2019), but at the same time exposed multiple novel targets of selection. For instance,  
163 three of the studies report genetic and/or transcriptomic divergence in immunity genes,  
164 and it has recently been confirmed that these molecular changes reflect differences in  
165 traits related to pathogen resistance (Fabian et al. 2018). Thus, despite variations in  
166 the experimental designs, numerous evolutionary repeatable phenotypic and genetic  
167 adaptations have been observed, but the importance of TEs in these studies has  
168 remained unexplored. Our main objective therefore was to investigate for the first time  
169 whether TE abundance in the genome, and host genes related to TE regulation, had  
170 undergone similar parallel changes. Using RNA-seq data from Carnes et al. (2015),  
171 we further test if males and females of selected populations evolved to suppress TE  
172 transcription to mitigate potentially negative effects on longevity.

173

## 174 **RESULTS**

### 175 **Genomic TE abundance**

176 Our initial goal was to test if transposable elements differ in the number of genomic  
177 insertions between late-breeding, long-lived selection (S) and early-breeding control  
178 (C) populations of four studies performing experimental evolution of postponed  
179 senescence (**Table S1**). As a first step, we excluded all TEs that did not pass our  
180 coverage and mapping quality filters and therefore included between 110 to 115 TEs  
181 dependent on the study in our downstream analysis. We then used three different  
182 approaches to test differences in TE abundance across control and selection regimes  
183 (see overview in **Fig. S1**).

184 As sequencing depth varies throughout the positions within a TE, resulting in a  
185 distribution of insertion counts rather than a single point-estimate, we first analyzed  
186 the differences between regimes using all insertion value estimates within individual  
187 TEs separately for each study (**Fig. 1** and **Table 1**). We found that between 46% and  
188 77% of all TEs had a significantly larger number of genomic insertions in the selected  
189 populations relative to controls after Bonferroni correction for multiple testing (from  
190 here on referred to as S>C TEs). In contrast, only 12% - 31% of TEs showed the  
191 opposite pattern and had more insertions in the controls (from here on referred to as  
192 C>S TEs). As expected, the magnitude of difference in TE insertions between regimes

193 was correlated with the genomic copy number of TE families (Pearson's  $r$ ,  
194 Carnes2015: 0.81, Fabian2018: 0.52, Hoedjes2019: 0.77, Remolina2012: 0.6, all  $P <$   
195 0.0001). To correct for this, we also obtained  $\log_2$  fold change (FC) values by dividing  
196 average insertions of selected by control populations for each TE (lower panels in **Fig.**  
197 **1**). S>C TEs had significantly larger  $\log_2$  FC values in the two short-term evolution  
198 studies of Hoedjes2019 and Remolina2012, while the opposite pattern and no  
199 difference was observed for Fabian2018 and Carnes2015, respectively (**Fig. S2A**;  $t$ -  
200 tests between absolute  $\log_2$  FC values of S>C and C>S; Carnes2015:  $P \sim 0.47$ ;  
201 Fabian2018:  $P \sim 0.01$ ; Hoedjes2019:  $P \sim 0.001$ , Remolina2012:  $P \sim 0.005$ ).

202 This demonstrates that the dynamics of TE change between control and selected  
203 populations varies among studies. Indeed, we find that studies also differed  
204 significantly in the size of  $\log_2$  FC values in the order of Carnes2015 > Fabian2018 >  
205 Hoedjes2019 = Remolina2012 (**Fig. S2A**; ANOVA with Study term, Tukey post hoc  
206 test;  $P < 0.001$  for all pairwise comparisons except Hoedjes2019-Remolina2012,  
207 which was not significant), seemingly scaling with the length of selection (Carnes2015:  
208 170; Fabian2018:  $\sim 146$ ; Hoedjes2019: 58, Remolina2012: 50 generations).

209 As a second, complementary approach to test for TE abundance differences between  
210 selection and control regimes, we also fitted linear models using average number of  
211 insertions per TE and population and analyzed the four studies together. Because the  
212 total number of TEs was significantly different between studies (ANOVA  $P < 0.0001$   
213 of Study factor; **Fig. S3**), we normalized the insertion counts of each individual TE by  
214 the total insertions in the corresponding population and analyzed arcsine square root  
215 transformed proportions (**Fig. S1B** and **Fig. S1C**). At an FDR of  $< 0.05$ , we identified  
216 41 TEs with a significant regime factor of which 34 were more and 7 less abundant in  
217 selected populations, confirming our findings of individual studies (**Table 1**).  
218 Comparable tendencies were obtained when we analyzed the raw insertion counts or  
219 standardized z-scores of insertions and changing the significance threshold did not  
220 alter the fact that S>C TEs were more frequent than C>S (not shown).

221 In our third - and most conservative - analysis, we identified TEs with consistent  
222 differences in genomic TE insertions between all control and all selected populations  
223 (**Table S2**). Interestingly, the number of TEs were generally smaller compared to our  
224 statistical approach indicating that TEs within control or selected populations do not  
225 always behave in a parallel way. The insertion tendency in favor of S>C was again  
226 apparent in three studies. In Hoedjes2019, however, we observed the same pattern

227 for populations selected on larval diet with low and medium sugar/protein  
228 concentration, but the opposite for the high sugar/protein diet. A qualitatively similar  
229 results was obtained applying the statistical approach from above (**Fig. S4** and **Table**  
230 **S3**). Yet, the overall increase in TE insertions in late-breeding populations was  
231 apparent in our model which corrects for the effect of diet (**Fig. 1** and **Table 1**).

232 We further tested if our results are influenced by the chosen mapping quality cut-off of  
233 20 and redid the analyses without applying a threshold. The number of genomic  
234 insertions per TE were highly correlated between both mapping approaches  
235 (Pearson's  $r$  range = 0.94 – 1 in all populations and studies,  $P < 0.0001$ ), and changing  
236 the cut-off resulted in similar proportions of S>C and C>S TEs (not shown).

237

238 To analyze if changes in TE abundance are driven by certain TE subclasses (Long  
239 Terminal Repeat, LTR; Non-Long Terminal Repeat, non-LTR; Terminal Inverted  
240 Repeat, TIR) or class (RNA, DNA) we tested S>C and C>S TEs for enrichment of  
241 these types using two-sided Fisher's exact tests. We only detected a significant  
242 underrepresentation of TIRs and DNA-class TEs (i.e. overrepresentation of RNA-  
243 class) in the C>S group of TEs of Carnes2015 and Hoedjes2019 (Carnes2015, TIRs:  
244  $P \sim 0.044$ ; DNA/RNA class:  $P \sim 0.024$ ; and Hoedjes2019, TIRs:  $P \sim 0.013$ ; DNA/RNA  
245 class:  $P \sim 0.008$ ), while significant TEs of Fabian2018 and Remolina2015 had no  
246 enrichment in class or subclass.

247 Despite the bulk of individual TEs had a higher genomic abundance in the selected  
248 populations, the whole genomic TE content was not significantly different between the  
249 regimes (ANOVA Regime factor:  $P \sim 0.086$ ; **Fig. S3**). This was at least partly driven  
250 by the fact that relative to S>C TEs, the fewer C>S TEs showed a significantly higher  
251 magnitude of insertion differences in two studies (**Fig. S2B**, t-test on S>C vs C>S TEs  
252  $\delta$ Insertion values; Carnes2015  $P \sim 0.04$ ; Fabian2018  $P \sim 0.005$ ). The non-significant  
253 difference in overall genomic TE load could therefore be a result of a large number of  
254 S>C TEs with small differences that are balanced by fewer C>S TEs with large  
255 differences. We further analyzed the whole genomic content of individual subclasses  
256 of TEs and identified that selected populations had on average a significantly higher  
257 number of TIRs than controls (**Fig. S3**, ANOVA, both Regime and Regime x Study  
258 factors,  $FDR < 0.001$ ). Tukey tests analyzing differences between selected and control  
259 populations indicated that this effect is strongly influenced by Carnes2015 (Tukey



260 HSD, Regime x Study factor testing for C vs S within studies, Carnes2015:  $P < 0.0001$ ;  
261 Hoedjes2019:  $P \sim 0.85$ ; Fabian2018 and Remolina2012:  $P \sim 1$ ). We also detected that  
262 selected populations had a larger LTR retrotransposon load than controls (ANOVA,  
263 Regime factor,  $P \sim 0.026$ ), whereas non-LTR content did not differ significantly.  
264 Finally, we note that studies in general varied significantly in total TE content and  
265 subclass-specific loads (ANOVA, Study factor,  $P < 0.0001$  in all models).  
266 In summary, our results demonstrate that selection for postponed reproduction leads  
267 to evolutionary repeatable increases in copy number of many TEs relative to early  
268 bred controls, without affecting the overall genomic TE load.

269

### 270 **Approximate TE mobility**

271 We next tested if the change in abundance of TEs between control and selected  
272 populations can be explained by differences in average population frequency of TE  
273 insertions which serves as a proxy for recent mobility and age of TE invasion (Kofler  
274 et al. 2015).

275 We first determined the exact genomic location and frequency of TE insertions and  
276 calculated average population frequency across all insertion sites for each TE family.  
277 Importantly, while TE abundance (as above) is quantified by the total number of reads  
278 mapping to a TE relative to single-copy genes (Weilguny and Kofler 2019), identifying  
279 the exact genomic location of insertions requires mates of a read-pair to map  
280 discordantly to the chromosome and TE sequence, and therefore strongly depends  
281 on the sequencing depth and number of populations (Cridland et al. 2013; Kofler et al.  
282 2016; Lerat et al. 2019). The genome-wide average coverage  $\sim 162$ ,  $\sim 101$ ,  $\sim 41$ , and  
283  $\sim 23$  for Fabian2018, Hoedjes2019, Remolina2012, and Carnes2015, respectively. As  
284 expected, the number of detected TE insertions partially scaled with coverage: across  
285 all populations within a study, we found 13,018 TE insertions in Hoedjes2019, 8,402  
286 in Fabian2018, and 4,502 in Remolina2012, which is in the range recently identified in  
287 natural populations (i.e. 4,277 - 11,649 TE insertions in Lerat et al. 2019). The least  
288 number of insertions was found for Carnes2015 for which we identified an unusually  
289 small number of 567 TE insertions.

290 For each TE family, we then averaged frequencies across all of its detected genomic  
291 positions to estimate the mean frequency at which a TE is segregating in a population  
292 (Kofler et al. 2015). Studies varied in the minimum average TE frequency in the order  
293 of Carnes2015 > Remolina2012 > Fabian2018 > Hoedjes2019, which is likely a further

294 effect of dissimilar sequencing depths and other experimental factors (average  
295 frequency ranges of Hoedjes2019: 0.01 - 0.9; Fabian2018: 0.02 - 1; Remolina2012:  
296 0.04 - 0.84; Carnes2015: 0.19 – 0.9). The TE frequencies of Carnes2015 therefore  
297 need to be interpreted with care, considering the likely insufficient amount of data.

298

299 To get unbiased average TE frequency estimates independent of coverage  
300 fluctuations across studies, we also obtained average frequencies from a single  
301 natural South African (SA) population (Kofler et al. 2015; Kofler 2019). The SA  
302 population had a higher sequencing depth than all studies here (Fabian2018: ~2x,  
303 Hoedjes2019: 3.2x; Remolina2012: ~7.8x, Carnes2015: ~13.9x times more) and thus  
304 presumably a more accurate estimate of TE frequencies. Notably, this population was  
305 not subjected to any selection or control treatment and was only maintained 8  
306 generations in the lab before sequencing. Average genome-wide TE frequencies of  
307 control and selected populations of Fabian2018, Hoedjes2019 and Remolina2012, but  
308 not Carnes2015, were significantly correlated with the South African TE frequencies  
309 (**Fig. S5**; Spearman's  $r$ , Fabian2018: 0.65; Hoedjes2019: 0.61; Remolina2012: 0.58,  
310 all three  $P < 0.0001$ ; Carnes2015: 0.1,  $P \sim 0.4$ ), demonstrating that the SA population  
311 can function as an appropriate reference here.

312 Previous studies reported that low frequency TEs are more abundant in genomes of  
313 *D. melanogaster* (Petrov et al. 2011; Kofler et al. 2015). We confirmed that for all  
314 populations, TE abundance was similarly negatively correlated with average TE  
315 frequency of the SA population (Spearman's  $r$  range, Carnes2015: -0.49 to -0.54;  
316 Fabian2018: -0.4 to -0.5; Hoedjes2019: -0.42 to -0.45; Remolina2012: -0.5 to -0.51;  
317 all  $P < 0.0001$ ). Moreover, we obtained comparable results when we performed this  
318 analysis using the average TE frequencies of Fabian2018, Hoedjes2019 and  
319 Remolina2012 (Spearman's  $r$  averaged across all populations, Fabian2018: -0.33;  
320 Hoedjes2019: -0.37; Remolina2012: -0.4, all populations  $P < 0.001$ ; Carnes2015: -  
321 0.29 to 0.28, two populations significant at  $P < 0.05$ ). The transposable element  
322 content of all populations can therefore be characterized by a large number of TEs  
323 with low frequency, whereas TEs with a high population frequency are less abundant  
324 in the genomes.

325 We then employed the data of the SA population and asked if C>S and S>C TEs vary  
326 in average frequency to identify TEs that have presumably been mobile in the two  
327 regimes (**Fig. 2**). C>S TEs had a significantly lower frequency than S>C TEs in all four

328 studies (t-tests between C>S and S>C frequencies,  $P < 0.05$  for all three studies). As  
329 there were more S>C than C>S TEs, we also contrasted the average frequencies of  
330 the top 10 C>S and S>C TEs with the biggest changes in genomic abundance defined  
331 by  $\log_2$  FC values (lower panel of **Fig. 1**). We only detected a significantly higher  
332 frequency in top 10 S>C relative to C>S TEs for Carnes2015 (t-test,  $P \sim 0.03$ ), but not  
333 in the other two studies. Except from the marginal difference in Carnes2015, this  
334 suggests that TEs with the biggest abundance changes between regimes have similar  
335 levels of mobility.

336 In summary, our analysis proposes that C>S TEs are potentially mobile, low frequency  
337 TEs expanding to new sites in the genome, whereas S>C TEs span from low to high  
338 frequency, possibly reflecting TEs with a broad range of transposition rates.

339

#### 340 **Selection on TE abundance and insertions**

341 A major challenge in experimental evolution studies is to differentiate selection from  
342 the confounding genomic signals of genetic drift, which might be amplified by small  
343 effective population sizes ( $N_e$ ) or varying generation times spent in the lab between  
344 control and selected populations. We therefore calculated genome-wide nucleotide  
345 diversity  $\pi$  and Watterson's  $\theta$  across 100kb windows as a proxy for  $N_e$ . With the  
346 exception of Fabian2018, where  $\pi$  was equal between regimes (ANOVA, Regime  
347 factor,  $P \sim 0.18$ ), we found that both estimators were significantly higher in selected  
348 relative to control populations (**Table S4**; ANOVA, Regime factor, all  $P < 0.0001$ ). Even  
349 though a generally reduced  $N_e$  in controls should lead to the loss of low and fixation of  
350 high frequency TEs under neutrality, we observed the opposite pattern in our analysis  
351 above (**Fig. 2**).

352 To further formally test if the increased abundance of many TEs is driven by genetic  
353 drift alone, we performed population genetic simulations using the correlated average  
354 TE frequencies from the natural South African population (Kofler et al. 2015) as a  
355 starting point (see **Fig. S5** and results above). We simulated TE frequency change in  
356 selected and control populations 5,000 times given the reported consensus population  
357 sizes as  $N_e$ , generation times and number of replicates. We then asked how often the  
358 same or a higher relative proportion of S>C to C>S TEs as in our observations is  
359 obtained (**Table 1**). While the results from Carnes2015, Hoedjes2019, and  
360 Remolina2012 were significantly different from the expected proportions, the TE

361 abundance differences of Fabian2018 could be caused by genetic drift alone (**Fig.**  
362 **S6**). Testing different ranges of the reported population sizes and assuming that only  
363 50% and 25% of flies in the selected populations were able to breed at old age resulted  
364 in qualitatively similar results (not shown). We also quantified expected proportions of  
365 TEs consistently varying in frequency across simulated replicates: while there were  
366 generally more TEs consistently higher in abundance in selected populations (**Table**  
367 **S2**), all our simulations resulted in more TEs with a consistently higher frequency in  
368 controls. The increased genomic abundance of many TEs in selected populations is  
369 therefore unlikely to be solely caused by genetic drift.

370

371 Considering the deviation from neutrality, we next asked if the parallel patterns in TE  
372 abundance are caused by the same or different TEs, which could indicate selection  
373 acting on genomic copy number of certain TEs. We considered the TEs significantly  
374 varying in abundance from the first linear model in which we analyzed each study  
375 separately (**Fig. 1** and **Table 1**), and created study-overlaps of S>C and C>S TEs.  
376 Among the 103 common TEs, we identified a sharing of 14 S>C and 2 C>S TEs across  
377 all four studies (**Fig. 3A**). Even though this seemingly large number of shared S>C  
378 TEs, only the overlap between Remolina2012 and Hoedjes2019 was significant ( $P <$   
379  $0.05$ ). Yet, we found that the most common telomeric TE *HeT-A* (Casacuberta 2017)  
380 was significantly more abundant in selected populations in all four studies and in our  
381 combined model (**Fig. S1**), suggesting that long-lived populations might have evolved  
382 longer telomeres to avoid attrition, which is considered to be a key conserved  
383 mechanism of aging (López-Otín et al. 2013). In contrast to S>C TEs, we detected  
384 several significant overlaps for the C>S group of TEs. Potentially, a high genomic  
385 abundance of several TEs, most importantly *G-element* and *G2* found in all four  
386 studies, is detrimental for longevity and late-reproduction (**Fig. 3B**). Despite some  
387 significant overlaps, we did not observe any significant Spearman's correlation  
388 coefficients in pairwise comparisons of  $\log_2$  FC values between studies except for  
389 Hoedjes2019-Remolina2012 ( $r = 0.28$ ,  $P \sim 0.004$ ).

390

391 Genomic TE abundance in selected populations might also be increased because  
392 selection acted on a large number of TEs segregating in the base populations resulting  
393 in frequency divergence between control and selected populations. We therefore  
394 screened all identified TE insertion sites across the genome for significant frequency

395 differences between regimes in each study by performing ANOVAs on arcsine square  
396 root transformed frequencies and Bonferroni correction. We did not find any TE  
397 insertions significantly varying in frequency in Carnes2015 and Remolina2012, and  
398 using a less stringent cut-off at  $FDR < 0.05$  did not change this result. However, we  
399 detected 38 significant TE insertions out of 8,402 in Fabian2018 and 100 out of 13,018  
400 in Hoedjes2019 (**Fig. 3C** and **Fig. 3D, Table S5**). While there were more TEs with a  
401 significantly higher frequency in control populations in Fabian2018 (8 higher vs 30  
402 lower frequency in S), the opposite pattern was observed in Hoedjes2019 (56 higher  
403 vs 44 lower frequency in S).

404 At the gene level, the significant TEs defined 29 and 98 genes in Fabian2018 and  
405 Hoedjes2019, respectively, and none were shared between the two studies. In  
406 accordance with the notion that most TEs are neutral (Arkipova 2018), only a  
407 negligible fraction of insertions might be beneficial for longevity and postponed  
408 reproduction.

409 To further investigate if frequency changes explain variation in abundance, we tested  
410 if each TE family varying in abundance also differs significantly in frequency between  
411 the regimes, rather than analyzing individual insertion sites (**Table S6**). We fit the  
412 same model as for the abundance analysis but using arcsine square root transformed  
413 TE frequencies (**Figure S1A**). At an  $FDR < 0.05$ , we found that in Carnes2015, 27 TE  
414 families had a higher frequency and abundance in selected populations, while 7  
415 showed a mismatch in direction of frequency and abundance change. In Fabian2018  
416 and Hoedjes2019, we only detected 1 and 3 TE families with significant frequency  
417 variation all of which matched the differences in abundance, whereas none were  
418 significant in Remolina2012.

419 Thus, despite differences in TE abundance are likely not driven by neutral evolution  
420 alone, we only found limited evidence for parallel evolution of TE copy numbers and  
421 sparse TE frequency differentiation.

422

### 423 **Differential TE expression**

424 To test whether the increased genomic abundance of TEs in selected flies is explained  
425 by a higher transcriptional activity we analyzed RNA-seq data from whole flies of  
426 Carnes2015 (**Fig. 4** and **Table S7**). We first fit a model with *Sex*, *Age*, *Regime* and all  
427 interactions to every TE and each gene on the major chromosomal arms. In line with  
428 abundant sexual dimorphism of gene expression observed by Carnes et al. (2015),

429 we identified that ~93% of TEs had a significant main factor of sex or interaction  
430 including it, whereby all 109 TEs significant for the sex term had a higher expression  
431 in males than females (**Fig. 4A** and **Fig. S7**). To exclude that this is caused by a  
432 technical artifact, we asked if a similar male-bias is observed for the genes on the  
433 major chromosomal arms. We found that 53% of all 13,255 included genes had a  
434 significantly higher expression in males while 37% were biased towards females.  
435 Moreover, the proportions of genes with male-, female- or no bias was significantly  
436 different from the proportions observed for TEs ( $\chi^2$  test on counts of TEs vs genes,  $P$   
437  $< 0.0001$ ). Because we do not find a similarly strong male-biased expression for genes  
438 or a higher number of read counts in males (not shown), we conclude that TEs are  
439 generally higher expressed in males than females in the present populations.

440

441 We therefore decided to test the effects of *Regime*, *Age*, and the *Regime x Age*  
442 interaction in the sexes separately (**Fig. 4, Table S7**). We detected several TEs  
443 differentially expressed between selected and control regimes. In males, 19 TEs  
444 (~16% of total) had a significant regime term of which a majority of 17 TEs were  
445 upregulated in controls (**Fig. 4B**). Among these, there were 10 LTRs, 6 non-LTRs, and  
446 1 DNA-class foldback TE, whereas the 2 upregulated in selected populations were  
447 both non-LTR TEs (*TART-A*, and *TART-B*). Less TEs changed across regimes in  
448 females (10 TEs, ~8%) compared to males. However, females showed a similar  
449 tendency towards higher expression in controls: 6 TEs had a higher and 4 TEs a lower  
450 expression in controls relative to selected flies. The 6 TEs with a higher expression in  
451 controls consist of 1 non-LTR (*R1A1-element*) and 5 LTR TEs (*copia*, *flea*, *blood*,  
452 *mdg1*, and *rooA*), while the 4 more in selected were 3 non-LTR (*TART-A*, *TART-B*,  
453 *TAHRE*) and 1 LTR (*1731*). We also observed that the 6 TEs significant in both sexes  
454 also had the same directionality of expression change: 4 LTR-class TEs (*copia*, *flea*,  
455 *blood*, and *mdg1*) were higher expressed in controls, whereas 2 non-LTR TEs (*TART-*  
456 *A*, and *TART-B*) were upregulated in selected populations. Interestingly, *TART-A*,  
457 *TART-B*, and *TAHRE* provide the enzymatic machinery for telomeric maintenance  
458 (Casacuberta 2017), again suggesting that reduced telomere attrition evolved in  
459 response to selection paralleling the genome-based analysis. In general, regime  
460 affected TE expression in males and females similarly as indicated by a significant  
461 correlation of  $\log_2$  fold change values between sexes (**Fig. 4B**, Pearson's  $r = 0.7$ ,  $P <$

462 0.0001). We further asked if the magnitude of  $\log_2$  fold change varies between TEs  
463 more expressed in controls or selected populations, and did not find any significant  
464 difference (**Fig. S8**, t-test, females:  $P \sim 0.12$ ; males:  $P \sim 0.49$ ).

465

466 To investigate if derepression of TEs occurs with age, we compared the proportion of  
467 TEs up- or downregulated or unchanged with age to those of genes. For both male  
468 and females, we found a significant difference in the distributions of TEs and genes  
469 with age ( $\chi^2$  test on counts of TEs vs genes, for males:  $P < 0.0001$ ; for females:  $P \sim$   
470  $0.01$ ), demonstrating that TEs show generally different age-related expression  
471 changes than genes. Supporting the notion that TEs become derepressed during  
472 aging, the effect of age on TE expression in males was general as all 89 significant  
473 TEs (i.e.  $\sim 73\%$  of all included TEs) had a higher expression in older flies (**Fig. 4A** and  
474 **Fig. 4C**), whereas  $\sim 26\%$  of all genes increased and also  $\sim 26\%$  decreased expression  
475 with age. In contrast to this, the effect of age was less pronounced in females in which  
476 only 35 TEs ( $\sim 28\%$ ) had a significant Age factor. Surprisingly, less TEs than genes  
477 were upregulated with age in females (7% TEs and 15% genes), while 21% of TEs  
478 and 14% of genes decreased expression with age. Still, the TEs upregulated in older  
479 females had on average a significantly higher  $\log_2$  fold change of 1.3, relative to 0.53  
480 for the downregulated TEs (**Fig. S8**, t-test:  $P < 0.01$ ), consistent with the results of a  
481 recent study (Chen et al. 2016).

482 Moreover, 27 TEs had a significant age term in both male and female models, but only  
483 9 of them had the same sign and increased in expression with age (**Fig. 4A** and **Fig.**  
484 **4C**). Among these were 6 LTR (*copia*, *gypsy*, *mdg1*, *Burdock*, *rooA*, *springer*) and 3  
485 non-LTR transposons (*jockey*, *R1A1-* and *R2-elements*). This confirms previous  
486 findings that showed *copia*, *gypsy*, *Burdock*, *R1* and *R2* upregulation with increasing  
487 age (Li et al. 2013; Chen et al. 2016).

488 The 16 remaining shared TEs showed downregulation with age in females, but  
489 upregulation in males, further highlighting that age has generally different effects on  
490 TE expression in both sexes. In females, the 35 age-related TEs were also significantly  
491 enriched for retrotransposons whereas DNA-class TEs were underrepresented  
492 (Fisher's exact test,  $P \sim 0.02$ ). Male flies in contrast, did not show any enrichment.  
493 Thus, males exhibit a general upregulation of TEs regardless of their class during

494 aging, whereas females show a more complicated pattern with mainly RNA-class TEs  
495 affected by age.

496

497 No TE families showed a significant *Regime x Age* term in males, but the interaction  
498 was significant for 28 TEs (~23%) in females (**Fig. 4A**). These consisted of 13 non-  
499 LTR, 13 LTR, and 2 TIRs. Interestingly, most of these TEs were defined by a higher  
500 expression in young controls compared with selected flies of the same age (see **Fig.**  
501 **S9** for example). Selected populations then increased while controls decreased  
502 expression, meeting at a similar expression level at old age. This is comparable with  
503 recent studies which suggested that age-dependent changes in TE expression differ  
504 between genotypes (Erwin and Blumenstiel 2019; Everett et al. 2019).

505

506 To examine if the selected populations might have evolved to maintain a young TE  
507 expression profile, we compared differences between regimes to those that occurred  
508 with age (**Fig. 4D and 4E**). In both males and females  $\log_2$  FC values of all TEs were  
509 significantly correlated between regime and age (Pearson's correlation, females:  $r =$   
510  $0.55$ ,  $P < 0.0001$ ; males:  $r = 0.19$ ,  $P < 0.05$ ). Performing the same analysis only  
511 considering genes also resulted in significant positive correlations (Pearson's  
512 correlation, females:  $r = 0.37$ , males:  $r = 0.41$ , both  $P < 0.0001$ ), and the coefficients  
513 between males and females were more similar. Thus, variation in expression of genes  
514 and TEs between selected and control populations mirrors the changes between  
515 young and old flies.

516

517 In summary, our results propose that selected populations of Carnes2015 evolved to  
518 reduce TE expression particularly in males and to a smaller magnitude in females, but  
519 expression of most TEs was at the levels observed in controls. In agreement with  
520 sexual dimorphism (Brown and Bachtrog 2017) and age-related deregulation of TEs  
521 (Li et al. 2013; Chen et al. 2016), the effects of sex and age on TE expression were  
522 more dominant compared to regime.

523

#### 524 **Link between genomic and expression differentiation**

525 We next asked if the change in genomic TE abundance reflects the expression  
526 differences between selected and control populations. On average, TE expression  
527 was positively correlated to the number of genomic insertions in the genome (**Fig. 4F**,



528 Spearman's  $r \sim 0.74$ ;  $P < 0.0001$ ). To analyze if this association depends on the  
529 treatment, we separated our samples into different levels of sex, age, and regime. The  
530 number of genomic TE insertions predicted TE expression significantly across all  
531 conditions (**Table S8**). Interestingly, the correlation coefficients were similar across  
532 different sample groups, demonstrating that the relationship between expression and  
533 genomic abundance of insertions is not dependent on regime, sex or age. Thus, in  
534 Carnes2015, TE copy number is a robust predictor of TE expression regardless of  
535 treatment.

536

537 Next, we investigated if there are parallel changes in expression and genomic  
538 abundance of TEs significantly varying between regimes (**Table S9**). In males, 14 TEs  
539 were significant for regime in the genomic and expression analysis all of which were  
540 higher expressed in controls. Of these, 9 TEs were upregulated and had significantly  
541 more genomic insertions in controls (*blood*, *copia*, *F-element*, *Doc2-element*, *Doc3-*  
542 *element*, *G2*, *Porto1*, *ZAM*, *17.6*), while 5 TEs (*Circe*, *G5*, *mdg1*, *Tom1*, *Quasimodo*)  
543 had more copy numbers in selected populations. In females, 3 TEs (*blood*, *copia*,  
544 *R1A1-element*) were higher expressed and had a higher genomic abundance in  
545 controls, while 2 TEs (*1731*, *TAHRE*) were significantly more expressed and more  
546 abundant in selected populations. The remaining two TEs significant in the expression  
547 and insertion analysis (*mdg1*, *rooA*) showed different signs and had despite a larger  
548 number of genomic insertions in selected populations a higher expression in controls.  
549 This suggests that the absence of a strong link between expression and number of  
550 genomic insertions at the individual TE level. Indeed,  $\log_2$  FC expression and  $\log_2$  FC  
551 insertions between regimes was only correlated in males (Pearson's  $r = 0.31$ ,  $P <$   
552  $0.001$ ), and marginally not significant in females ( $r = 0.18$ ,  $P \sim 0.05$ ) (**Fig. S10**).

553 Because our results suggests some positive relationship between TE expression and  
554 genomic abundance, we re-did the differential expression analysis from above using  
555 RNA-seq read counts corrected for the number of TE insertions in each sample (**Table**  
556 **S10**). The tendency of TEs to be higher expressed in controls was substantially larger  
557 compared to the analysis where we did not correct for insertion numbers (males: 55  
558 TEs more, 2 TEs less expressed in controls; females: 16 TEs more, 3 TEs less  
559 expressed in controls).

560 Our results further emphasize that selection for late-reproduction leads to a reduction  
561 in TE expression in whole flies. Notably, we assumed that males have the same copy

562 number as females for the analyses here. As the genomic TE abundance measures  
563 came from DNA pools of female flies, copy number could differ from males due to the  
564 repetitive nature of the Y chromosome.

565

### 566 **Genes involved in TE regulation**

567 We next hypothesized that if the effects of TEs on lifespan and aging are  
568 predominantly negative, as proposed by many studies, experimental selection for  
569 longevity would have likely resulted in clear-cut genetic and expression differentiation  
570 in 96 known chromatin-structure, piRNA, and transposition-associated genes likely  
571 involved in TE regulation and silencing (**Table 2**, a complete list of genes can be found  
572 in **Table S11**). Of these, 10 genes were implicated under selection in Carnes2015, 3  
573 in Fabian2018, 7 in Hoedjes2019, and 6 in Remolina2012. *E2f1* (FBgn0011766) and  
574 *Hsp83* (FBgn0001233) were the only genes occurring in more than one study. Thus,  
575 the significant candidate gene sharing reported by Fabian et al. (2018) and Hoedjes  
576 et al. (2019) does generally not include genes regulating TEs. In line with this, the four  
577 studies did not report any significant enrichment of GO terms related to transposon  
578 silencing and chromatin structure.

579 Using the available RNA-seq data from whole flies of both sexes in Carnes2015 and  
580 microarray data from female heads and abdomens in Remolina2012, we then asked  
581 if TE regulation genes are differentially expressed (**Table S11**). In Carnes2015, we  
582 found that the 30 TE regulation genes with a significant regime term tended to be  
583 upregulated in controls relative to selected populations (males: 3 more and 8 less  
584 expressed; females: 6 more and 14 genes less expressed relative to selected  
585 populations). In Remolina2012, we detected generally little differences in transcript  
586 abundance between regimes at FDR < 0.05 (only 5 out of 13,995 genes significant in  
587 head tissue, none significant for abdomen). We therefore analyzed genes significant  
588 at  $P < 0.01$  (491 genes for heads, 8 for abdomen) for the regime term, and only  
589 detected 2 TE regulation genes of which one was more and the other lower expressed  
590 in selected flies.

591 Similar to the TE expression patterns in Carnes2015 (**Fig. 4A**), the effect of age was  
592 stronger than selection regime in both studies and significant TE regulation genes  
593 showed a clear tendency for upregulation with age. In males of Carnes2015, 41 TE  
594 regulation genes increased and 6 decreased expression with age. The effect was less  
595 pronounced in females in which 19 genes increased transcription and 8 decreased

596 with age. Likewise, in Remolina2012, all 5 TE regulation genes significant for age in  
597 heads ramped up transcription with age. The age effect was even stronger in  
598 abdomens, where 24 genes increased with age, while only one showed the opposite  
599 pattern.

600 Taken together, the small number of genetically differentiated TE regulation genes,  
601 lack of TE-associated GO enrichment, and overall missing sharing between studies  
602 suggests that improving TE repression was either specific to studies and/or not a prime  
603 target of selection. Indeed, experimental selection has mainly affected expression of  
604 TE regulation genes in the Carnes2015 long-term evolution study but not  
605 Remolina2012, suggesting that altering expression of these genes is not a general  
606 necessity for increasing lifespan. The boosted expression of TE regulation genes at  
607 older ages appears to be common and might be a response to increased TE  
608 transcription in old flies.

609

## 610 **DISCUSSION**

611 Are transposable elements conferring an adaptive advantage as shown for many traits  
612 (Daborn et al. 2002; Magwire et al. 2011; Kuhn et al. 2014; Li et al. 2018; Rech et al.  
613 2019) or should they be purged and repressed during the evolution of longevity due to  
614 their widespread negative effects on fitness (Chen et al. 2014; Krug et al. 2017;  
615 Prudencio et al. 2017; Guo et al. 2018; De Cecco et al. 2019)? In this report, we  
616 attempt to answer this controversial question by employing four independent data sets  
617 to present the first characterization of the genome-wide TE content and expression in  
618 *D. melanogaster* populations experimentally selected for late-life reproduction and  
619 longevity.

620

### 621 **Does longevity-selection lead to changes in TE abundance?**

622 Variation in TE copy number has been associated with some geographic and climatic  
623 factors (Kalendar et al. 2000; Kreiner and Wright 2018; Lerat et al. 2019) in natural  
624 populations of plants and *Drosophila* and was shown to change during experimental  
625 evolution in different temperatures (Kofler et al. 2018). Our analysis revealed  
626 repeatable predominance of TE families with increased genomic insertions in late-  
627 breeding, long-lived populations and indicates that reproductive age, with some  
628 dependency on developmental diet, is another factor influencing divergence in TE  
629 abundance (**Fig. 1** and **Table 1**). Interestingly, we find that the degree of TE

630 abundance change was significantly different between studies and roughly scaled with  
631 the number of generations under selection (**Fig. S2A**). While parallel changes in TE  
632 characteristics within populations of the same selection regime have been reported by  
633 similar experiments (Graves et al. 2017; Kofler et al. 2018), it is striking that we  
634 observed this pattern in data created by four independent studies. Despite most TE  
635 families are more abundant in long-lived populations, our analysis shows no significant  
636 difference in the total genomic TE content between control and selected populations  
637 (**Fig. S3**), which was partly driven by a few TEs with large increases in copy number  
638 in controls that oppose many TEs with small increases in abundance in selected  
639 populations (**Fig. S2B**). Changes in the overall genomic TE load are therefore likely  
640 not essential to evolve longevity or fecundity at old age in *Drosophila*. These findings  
641 are in contrast to recent work in several killifish species, which reported that TE  
642 expansion can cause an increased genome size with possible negative effects on  
643 lifespan (Cui et al. 2019). However, our analyses focused exclusively on the genomic  
644 TE load, so that we cannot exclude a difference in genome size between control and  
645 selected populations, as might be caused by other factors such as non-repetitive  
646 InDels or repetitive DNA unrelated to TEs.

647

#### 648 **Are TEs adaptive during the evolution of aging?**

649 The genomic content of TEs evolves through various factors including replicative  
650 transposition, selection, genetic drift, and the TE defense machineries of the host  
651 (Charlesworth and Charlesworth 1983; Kofler 2019). By performing population genetic  
652 simulations considering just genetic drift, we were able to exclude that population size  
653 and generations spent in the lab *per se* cause an increased abundance of TE families  
654 in selected populations (**Fig. S6**). Even though it is known that the majority of TE  
655 insertions are neutral to fitness (Arkhipova 2018), this proposes that factors other than  
656 genetic drift influenced TEs in our experiments.

657 From a selective point of view, increasing many TE families might be beneficial for  
658 longevity, while the fewer TEs less abundant in selected flies could have a negative  
659 effect. Under this scenario, selection would lead to parallel increases or decreases of  
660 the same TE families across studies. However, when we screened for parallel patterns  
661 in abundance change, we found only two TEs (*G-element* and *G2*) that had a  
662 decreased copy number in selected flies and were significantly shared across all  
663 studies. Both elements are *jockey*-like non-LTR TEs, of which *G2* is highly enriched in

664 centromeric regions of the genome (Chang et al. 2019). Thus, changing centromeric  
665 structure by altering its TE content could be one mechanism modulating aging, but  
666 experimental evidence for this is still missing. In contrast to this, we did not find any  
667 significant overlap between all four studies among TEs with an increased abundance  
668 in the late-breeding populations. Unless many TE families had non-repeatable effects  
669 on longevity, the small amount of significant sharing suggests that abundance of most  
670 TEs is neutral.

671 Another possibility to alter TE abundance is through selection affecting TE insertions  
672 that were already present in the base population at a genome-wide scale, resulting in  
673 a large number of TE insertions significantly varying in frequency between control and  
674 selected populations. We found only a minor fraction of TE insertions in Fabian2018  
675 and Hoedjes2019, but not in the other two studies, with significantly different  
676 frequencies between the regimes that are in or close to <100 genes (**Fig. 3** and **Table**  
677 **S5**). The small fraction of TE insertions with a higher frequency in selected populations  
678 found in only two studies together with little differences in frequency of TE families  
679 suggests that standing genetic variation presented by TEs plays a role in the evolution  
680 of aging, but it is unlikely to be a major driver of TE abundance differentiation.

681 Yet, we found a signal indicating potentially improved telomere maintenance – a key  
682 hallmark of aging and lifespan (López-Otín et al. 2013) – as an exciting mechanism  
683 possibly adaptive during the evolution of aging. Telomere shortening coincides with  
684 aging and has been associated to mortality, diseases and the rate of senescence in  
685 several organisms (Canela et al. 2007; López-Otín et al. 2013; Dantzer and Fletcher  
686 2015; Foley et al. 2018; Whittemore et al. 2019). In *D. melanogaster*, three TE families  
687 exclusively found in telomeres comprise most of their DNA-content, and are further  
688 essential for their enzymatic maintenance (Casacuberta 2017). In all four studies, we  
689 found that long-lived populations had on average an increased genomic abundance  
690 of *HeT-A*, which is thought to be the most common telomeric TE, although the  
691 difference was less clear in two studies after correcting for TE content (**Fig. 3A** and  
692 **Fig. S1**). Moreover, the very few TEs transcriptionally upregulated in males and  
693 females of long-lived populations in Carnes2015 were almost exclusively telomeric  
694 elements (**Fig. 4B**). Our study therefore provides the first indication of a genomic and  
695 transcriptional response of telomeric TEs to selection for postponed reproduction and  
696 longevity. Previous studies, however, failed to establish a connection between  
697 telomere length and lifespan. For instance, telomere length was not associated with

698 survival in *D. melanogaster* and *C. elegans*, but might affect other traits such as  
699 fecundity (Raices et al. 2005; Walter et al. 2007). Moreover, in several species the  
700 rate of telomere shortening rather than the initial length itself was a better predictor for  
701 lifespan (Whittemore et al. 2019). Another complication yet to be addressed in  
702 *Drosophila* concerns the phenomenon of ‘intergenerational plasticity’ of telomere  
703 length observed in several mammals including humans, where increased paternal age  
704 at reproduction causes longer telomeres in offspring for at least two generations  
705 (Eisenberg et al. 2012; Eisenberg and Kuzawa 2018). The exact impact of telomere  
706 length on evolutionary fitness and aging therefore remains to be poorly understood.

707

### 708 **Is TE expression detrimental for longevity?**

709 At the transcriptional level, age-dependent TE misregulation thought to be resulting  
710 from a gradual decline in heterochromatin maintenance has been proposed to be  
711 harmful for lifespan in *Drosophila* (Chen et al. 2016; Wood et al. 2016; Brown and  
712 Bachtrog 2017), mice (De Cecco et al. 2019), and humans (Bogu et al. 2019). Our  
713 RNA-seq analysis in whole flies did not identify a TE-wide decrease in expression in  
714 selected populations of Carnes2015 (**Fig. 4** and **Table S7**). In fact, TE expression  
715 appeared to be more strongly influenced by sex and age compared to selection  
716 regime. Nevertheless, TEs with a significant regime effect tended to be downregulated  
717 in selected populations, and this effect was even more apparent after we corrected for  
718 genomic copies. Our results are in line with the notion that transcription of several TEs  
719 is detrimental and reducing their expression could be beneficial for longevity (Li et al.  
720 2013; Wood et al. 2016; Guo et al. 2018). Together with the weak association between  
721 genomic abundance and expression (**Fig. S10**), this further proposes that lowering  
722 expression of TEs might be more important than purging TEs from the genome in the  
723 evolution of longevity.

724 Interestingly, the tendency towards lower TE expression in late-breeding populations  
725 as well as the age-related increase in expression with age was more pronounced in  
726 male flies. Almost all TEs had a higher expression in males relative to females (**Fig. 4**  
727 and **Fig. S7**). These findings are consistent with recent work showing that males suffer  
728 more from TE derepression during aging due to their entirely repetitive,  
729 heterochromatin-rich Y chromosome (Brown and Bachtrog 2017). If a systemically  
730 increased TE expression in males contributes to sexual dimorphism in lifespan is yet  
731 to be confirmed. DNA-sequencing of male flies in the four experimental evolution

732 studies would be necessary to determine if selection for postponed senescence had  
733 similarly strong effects on TE copy number of the Y chromosome.

734

### 735 **Did selection lead to differentiation in genes related to TE regulation?**

736 We also hypothesized that potential detrimental effects of TEs on longevity should be  
737 reflected by selection on genes related to TE regulation and transposition (**Table 2**  
738 and **Table S11**). Across the four studies, 3 to 10 out of 96 TE regulation genes have  
739 been reported as genetically differentiated candidates, of which only *E2f1* and *Hsp83*  
740 were shared between two studies. There was further little transcriptional differentiation  
741 between control and selected populations of Carnes2015 and Remolina2012 and no  
742 overlaps of these genes have been observed. The absence of a strong, shared signal  
743 of selection on these genes and missing GO enrichment associated to regulation of  
744 TEs allows us to hypothesize that improvement of chromatin  
745 structure/heterochromatin maintenance, piRNA-mediated silencing and modulators of  
746 transposition are generally not prime targets of selection during the evolution of  
747 longevity. This, however, does not preclude that other means of TE protection have  
748 evolved. It is becoming increasingly evident that TE expression acts as a causative  
749 agent of inflammation and immune activation in mammals (Kassiotis and Stoye 2016;  
750 De Cecco et al. 2019). Interestingly, Carnes2015, Fabian2018, and Remolina2012 all  
751 found significant divergence in innate immunity genes, whereas Fabian et al. (2018)  
752 demonstrated an improved survival upon infection and alleviated immunosenescence  
753 in the long-lived populations. Rather than reducing TE copy number and expression,  
754 selection might preferentially act on immunity genes to reduce TE-mediated  
755 inflammation and increase tolerance to TEs with improved lifespan as a consequence.  
756 It remains yet to be explored to what degree innate immune pathways other than the  
757 RNAi machinery contribute to TE regulation in *D. melanogaster*.

758

### 759 **Is reproduction at old age associated with an increased TE content?**

760 Our findings suggest that neither genetic drift nor pervasive selection on TEs or genes  
761 related to TE regulation are predominant drivers of the differences in TE abundance.  
762 The most parsimonious explanation for our results therefore is that postponed  
763 reproduction increases the chance of many TEs to be inserted into the germline and  
764 passed on to the next generation. TEs of low transpositional activity in particular might  
765 need a prolonged chronological time offered by late-life reproduction to achieve a

766 successful genomic insertion (**Figure 2**). Over many generations, flies breeding at old  
767 age would have accumulated more TEs in the genome than populations reproducing  
768 early in life. Supporting this hypothesis, it has been demonstrated that most TE  
769 families had a higher rate of insertions in the ovaries of older relative to young *P-*  
770 *element* induced dysgenic hybrids, even though at the same time fertility was restored  
771 and improved with age (Khurana et al. 2011). However, if this applies to non-dysgenic  
772 fruit flies and whether it can result in a larger number of TEs over multiple generations  
773 has to our knowledge not yet been observed. Thus, TE accumulation in late-breeding  
774 populations could be similar to the regularly observed positive correlation between  
775 parental age and number of *de novo* mutations in offspring (Goldmann et al. 2019;  
776 Sasani et al. 2019). In line with this, genome-wide measures of nucleotide diversity  
777 were also repeatably larger in late-breeding populations across four experiments  
778 (**Table S4**), although we have not ruled out that this was driven by genetic drift or  
779 balancing selection as proposed by one study (Michalak et al. 2017).

780 Opposing our hypothesis, two recent studies in termites (Elsner et al. 2018) and *D.*  
781 *melanogaster* (Erwin and Blumenstiel 2019) suggest that the germline is protected  
782 from TE invasions through increased transcription of the piRNA machinery. Indeed,  
783 our expression analysis confirms that many genes associated with transcriptional and  
784 post-transcriptional TE silencing tend to be upregulated with age. Despite this, TE  
785 families had a generally higher copy number in populations reproducing late in life. It  
786 therefore remains to be determined whether this age-dependent upregulation of TE  
787 regulation genes really equates to reduced insertional activity, since potential and  
788 realized TE repression might not necessarily match. The observation that these genes  
789 also tended to be more expressed in controls relative to selected flies in Carnes2015  
790 further poses the question whether there is a trade-off between TE silencing in the  
791 germline and lifespan, which could be another mechanism explaining the rising TE  
792 abundance in the genomes of long-lived flies.

793

794 Altogether, our work presents a novel viewpoint on the poorly understood role of TEs  
795 in aging and longevity that is largely, but not exclusively, neutral. However, the caveat  
796 remains that we are unable to rule out that survival of selected populations would be  
797 further extended if they had a reduced TE content and expression. In-depth studies  
798 tracking piRNA production in the germline together with direct measures of TE  
799 transposition rates throughout life or measuring longevity upon knockdown and



800 overexpression of TEs would be crucial experiments to obtain a more complete  
801 picture.

802

## 803 **MATERIALS & METHODS**

### 804 **Datasets**

805 We utilized genomic data from four independent studies performing laboratory  
806 selection for postponed reproduction on wild-derived replicate populations by only  
807 allowing flies of relatively old age to contribute to subsequent generations, whereas  
808 controls reproduced early in life (Remolina et al. 2012; Carnes et al. 2015; Fabian et  
809 al. 2018; Hoedjes et al. 2019) (**Table S1**). The experimental designs of the studies  
810 were overall comparable, but notable differences include the mode of selection,  
811 maintenance of controls, variable source populations, number of replicate populations  
812 and generations at sequencing. Moreover, Hoedjes2019 performed the selection for  
813 postponed senescence on three varying larval diets ranging from low to high  
814 sugar/protein content. The genomic analysis was based on available raw fastq files  
815 from whole-genome pool-sequencing of 100 to 250 females. RNA-seq data from  
816 Carnes et al. (2015) consisted of raw fastq files from pools of 50 flies. The study  
817 included transcriptomes of all selected and control populations, for which both sexes  
818 at two ages 3-5 days (young) and 26-35 days of age (old) have been sequenced in  
819 replicates. Microarray expression data from Remolina et al. (2012) are derived from  
820 heads and abdomens from females at the age of 1, 5, 15, 30, and 50 days of age from  
821 the three control and selected populations. See methods in the publications of each  
822 study for details on experimental design and **Table S1** for a summary. For simplicity,  
823 we refer to Carnes et al. (2015) as Carnes2015, Fabian et al. (2018) as Fabian2018,  
824 Hoedjes et al. (2019) as Hoedjes2019, and Remolina et al. (2012) as Remolina2012  
825 throughout this report.

826

### 827 **Genome-wide TE abundance**

828 To quantify the number of genomic insertions for each TE family in selected and  
829 control populations we used the assembly-free tool deviaTE (Weilguny and Kofler  
830 2019). In brief, deviaTE maps raw reads to a library of known TE sequences and  
831 normalizes the sequencing depth of each position within a TE to the average depth of  
832 multiple single-copy genes. The obtained distribution of normalized values reflects

833 coverage fluctuations within a TE, where averaging over all positions of a TE gives the  
834 mean abundance per haploid genome. We used raw fastq files as input and ran  
835 deviaTE with options: `--read_type phred+33` (phred+64 for Fabian2018), `--`  
836 `min_read_len 50`, `--quality_threshold 18`, `--hq_threshold 20`, `--min_alignment_len 30`,  
837 `--threads 20`, `--families ALL`, `--single_copy_genes`  
838 `Dmel_rpl32,Dmel_RpII140,Dmel_Act5C,Dmel_piwi,Dmel_p53`. TE abundance was  
839 estimated considering reads with a mapping quality of  $\geq 20$  by adding the “hq\_cov”  
840 and “phys\_cov” column from the deviaTE output. Due to sequence similarity within  
841 and between TEs, we further repeated most analyses using a less conservative  
842 mapping approach without filtering for mapping quality by using values from the “cov”  
843 column instead of “hq\_cov”. We restricted our downstream analysis to TEs that had a  
844 study-average of  $\geq 0.5$  insertions for at least 80% of the positions within a TE  
845 sequence, thereby excluding all TEs with very low abundance and potentially wrongly  
846 mapped reads.

847 We then investigated if the number of genomic abundance per TE varies between  
848 control and selected populations using three different approaches (**Fig. S1**). First, we  
849 tested each study (and diet regime for Hoedjes2019) independently and fit a model for  
850 every detected TE as:  $NormalizedCoverage \sim Regime + Population[Regime]$ , where  
851 *NormalizedCoverage* are the normalized coverage values reflecting insertion  
852 estimates of each position within a TE, allowing us to take the variance of insertion  
853 abundance within a TE into account. *Regime* is the effect of selection regime (levels:  
854 selected and control), and *Population[Regime]* is the effect of the different replicate  
855 populations nested within Regime. To obtain the overall effect of breeding regime in  
856 Hoedjes2019, we fit:  $NormalizedCoverage \sim Diet + Regime + Diet \times Regime$ , where  
857 *Diet* corresponds to the three larval diets the flies were raised on (low, medium, high).  
858 To correct for multiple testing and to define significant differences in TE abundance,  
859 we applied a Bonferroni cut-off at  $\alpha = 0.01$ .

860 To visualize differences in genomic abundance of TEs shown in **Fig. 1**, we first  
861 calculated the average number of insertions per TE for each breeding regime. We then  
862 took the absolute difference per TE by subtracting control from selected insertion  
863 values ( $\delta Insertions$ , upper panel in **Fig. 1**). We used Pearson’s correlation to show  
864 that  $\delta Insertions$  from each TE were expectedly correlated to its copy number in the  
865 genomes. To correct for this, we divided the selected by control number of insertions

866 per TE and took the  $\log_2$  of these values to obtain the  $\log_2$  fold change ( $\log_2 (S / C)$ ,  
867 lower panel in **Fig. 1**). We further used *SuperExactTest* (Wang et al. 2015) to analyze  
868 if the overlap of TEs with a significantly higher genomic abundance in selected (“S>C”)  
869 or control populations (“C>S”) between postponed senescence studies is expected by  
870 chance.

871 In our second approach, we combined all four studies and only considered a single  
872 average insertion value per TE instead of taking all positions into account. We then  
873 summed up all TE insertion values within a population to obtain the total genomic TE  
874 content. Because the total insertion TE content was significantly different between  
875 studies (see **Fig. S3** and methods below), we normalized the insertion counts of each  
876 TE by the total insertions in the corresponding population, and fit a combined model  
877 as:  $\text{asin}(\sqrt{\text{NormalizedInsertions}}) \sim \text{Study} + \text{Regime} + \text{Regime} * \text{Study}$ , where  
878  $\text{asin}(\sqrt{\text{NormalizedInsertions}})$  is the arcsine square root transformed proportion of  
879 insertions per TE relative to the total genome-wide TE content in each population. The  
880 *Study* term had four levels (Carnes2015, Fabian2018, Hoedjes2019, Remolina2012),  
881 whereas *Regime* is as described above. As not all positions within a TE are considered  
882 in this model, statistical power is lower than in the previous approach above. We  
883 therefore performed a less stringent multiple testing correction by employing an FDR  
884 cut-off of 0.05 using the “p.adjust” function with method “fdr” in *R*.

885 Third, we identified all TEs that showed a consistent increase or decrease in the  
886 genomic abundance within all selected populations relative to all control populations  
887 of a given study and within diet regimes of Hoedjes2019.

888 To analyze if the total genomic TE content varies between control and selected  
889 populations, we calculated the total TE load across the whole genome, and TE  
890 subclasses of Long Terminal Repeat (LTR), Non-Long Terminal Repeat (non-LTR),  
891 and Terminal Inverted Repeat (TIR) by summing up all insertion values of each TE  
892 family per population. We then used these sums as dependent variables in a statistical  
893 model with *Study*, *Regime* and the *Study x Regime* interaction as factors.

894 All statistics were done in *R* using in-built functions unless otherwise stated. We did  
895 not consider the effect of diet in the models combining all studies.

896

### 897 **Genomic TE locations and approximate mobility**

898 To identify the exact genomic positions and population frequency of TE insertions, we  
899 used the program PoPoolationTE2 (Kofler et al. 2016). We first quality trimmed paired-

900 end raw reads using cutadapt (v.2.0) (Martin 2011) with options: --minimum-length 50  
901 -q 18 and also --quality-base=64 for Fabian2018. Next, we masked the *D.*  
902 *melanogaster* reference (v.6.27) for TEs present in the deviaTE library using  
903 RepeatMasker (v.4.0.9) (Smit et al. 1996) with the RMBlast (v.2.9.0) search engine  
904 and set options as recommended in the PopoolationTE2 manual (-gccalc -s -cutoff  
905 200 -no\_is -nolow -norna -gff -u -pa 18). Trimmed reads were then mapped against  
906 the masked reference genome using bwa bwasw (v.0.7.17) (Li and Durbin 2009). We  
907 restored paired-end information as outlined in the PopoolationTE2 pipeline (function  
908 *se2pe*) and generated a *ppileup* file (function *ppileup*) applying a mapping quality cut-  
909 off of 15. TE insertions were then identified using the functions *identifySignatures* (--  
910 signature-window fix500, --min-valley fix150; and due to differences in the number of  
911 replicate populations we chose --min-count 3 for Remolina2012 and Fabian2018, --  
912 min-count 5 for Carnes2015, or --min-count 12 for Hoedjes2019). Finally, we applied  
913 the *frequency* and *pairupSignatures* (--min-distance -200 --max-distance 300)  
914 functions and filtered identified TEs using *filterSignatures* (--max-otherte-count 2 --  
915 max-structvar-count 2) to create the final set of TE insertions. We only included sites  
916 covered in all populations within a study and restricted our analysis to chromosomes  
917 X, 2, 3, and 4. For each TE family, we calculated the average population frequency  
918 across all of its identified genomic locations within a population as a proxy for active  
919 or recent transposition events (Kofler et al. 2015). We used Spearman's correlation  
920 analysis to compare average frequency values of each study to average frequencies  
921 from a natural South African (SA) population sequenced to a high genomic coverage  
922 (Kofler et al. 2015), and to correlated TE abundance with average frequency. We  
923 employed t-tests to analyze if average population frequency from the SA population  
924 varies between TEs more abundant in selected or controls, and also performed this  
925 analysis using only the top10 TEs with the largest log<sub>2</sub> FC values of abundance  
926 change.

927

## 928 **Genome-wide nucleotide diversity**

929 We mapped trimmed paired-end reads against a fasta file including the repeat-masked  
930 v6.27 reference genome (see above), TE library from deviaTE (Weilguny and Kofler  
931 2019), *Wolbachia pipientis* (NC\_002978.6), and two common gut bacteria *Acetobacter*  
932 *pasteurianus* (AP011121.1), and *Lactobacillus brevis* (CP000416.1) using *bwa mem*  
933 (v.0.7.17) (Li and Durbin 2009), and then created sorted bam files with the samtools

934 (v.1.9) (Li et al. 2009) functions *view* (-Sb) followed by *sort*. Duplicates were removed  
935 using PicardTools (v.2.18.27) function *MarkDuplicates* with  
936 REMOVE\_DUPLICATES=true. For Remolina2012, we merged files from the same  
937 population sequenced on multiple lanes using samtools *merge*. We then filtered and  
938 created pileup files using samtools *mpileup* with option -q 20 --rf 0x2 --ff 0x4 --ff 0x8 -  
939 f (and -6 for Fabian2018). Average coverage per study was determined only using  
940 major chromosomal arms. We detected reads mapping to the genome of the  
941 intracellular bacterium *Wolbachia* for all populations. To calculate nucleotide diversity  
942  $\pi$  and Watterson's  $\theta$  across non-overlapping 100kb windows we used *Variance-*  
943 *sliding.pl* implemented in PoPoolation (Kofler et al. 2011) with parameters --min-count  
944 2 --min-coverage 5 --window-size 100000 --step-size 100000 --pool-size 100 --  
945 measure pi (or theta) --fastq-type sanger --min-covered-fraction 0.6. We set the  
946 maximum coverage threshold (--max-coverage) to two times the average genome  
947 coverage of each population. The range of cut-offs used in each study was 20-74 in  
948 Carnes2015, 286-355 in Fabian2018, 67-107 in Remolina2012 and 166-228 in  
949 Hoedjes2019. We then analyzed variation in  $\pi$  and  $\theta$  using ANOVA models including  
950 the factors *Chromosome* (X, 2L, 2R, 3L, 3R, 4), *Diet* (low, medium, high), *Regime*  
951 (control, selected) and the *Diet x Regime* interaction for Hoedjes2019, and  
952 *Population[Regime]*, *Chromosome*, and *Regime* for all other studies.

953

#### 954 **Genetic drift simulations**

955 As the analyzed studies did not include data from the ancestral populations, we used  
956 average TE frequencies from the South African population (Kofler et al. 2015) as a  
957 starting point in our simulations. To simulate frequency change of each TE, we set  
958 population sizes (N), generation times and number of replicate populations as  
959 mentioned in the original publications (**Table S1**). As some studies reported a range  
960 of population sizes, we performed simulations using the lower and upper limits. We  
961 used the *rbinom* function in R and drew from a size of 2N considering the diploid  
962 genome and given the average frequency of a TE as probability to be drawn. The  
963 number of successful draws was divided by 2N to obtain the new TE frequency and  
964 used as input for the next draw. We repeated this process until the generation times  
965 at sequencing of control and selected populations were reached. Using the simulated  
966 TE frequencies in the last generation, we calculated average TE frequency across all

967 simulated replicates within breeding regime. Next, we obtained the proportion of TEs  
968 with a higher (S>C) and lower frequency (C>S) in selected populations and calculated  
969 the  $\log_2$  relative proportion (i.e.  $\log_2$  of S>C proportion divided by C>S proportion). As  
970 an additional approach, we also acquired the  $\log_2$  relative proportion by using the  
971 number of TEs with consistent differences in frequency between all the populations of  
972 the regimes instead of averaging. We performed 5,000 simulations to get a distribution  
973 of relative proportions expected under genetic drift. P-values were calculated by  
974 dividing the number of simulations that resulted in a larger or equal proportion as  
975 observed in the actual analysis by the total number of simulations.

976

### 977 **TE frequency differences**

978 We further asked if certain genomic TE insertions are putatively involved in lifespan  
979 and aging as might be indicated by a consistent TE frequency differences at any  
980 genomic site between selected and control populations. We used the identified TE  
981 insertions and frequency estimates from PopoolationTE2 (see above). Significant  
982 difference in frequency between selected and control populations were determined by  
983 t-tests analyzing differences in arcsine square root transformed frequencies between  
984 regimes for Carnes2015, Fabian2018, and Remolina2012. For Hoedjes2019, we used  
985 a linear model with *Diet*, *Regime*, and *Diet x Regime* as factors. Bonferroni correction  
986 at  $\alpha = 0.05$  was used to correct for multiple testing. Functional annotations were  
987 supplemented using SnpEff (v.4.0e, Cingolani et al. 2012) and the *D. melanogaster*  
988 reference v6.27 considering TE insertions within 1000 bp of the 5' and 3' UTR as  
989 upstream or downstream of a gene.

990 We analyzed if each TE family varies in frequency between regimes by fitting the  
991 factors of *Diet*, *Regime*, and *Diet x Regime* for Hoedjes2019, or *Regime* and  
992 *Population[Regime]* for all other studies on arcsine square root transformed insertion  
993 site frequencies. FDR values were obtained by using “p.adjust” in *R* and TE families  
994 considered significant at FDR<0.05.

995

### 996 **RNA-seq analysis**

997 RNA-seq data from Carnes et al. (2015) consisted of two replicates of young and old  
998 males and females from all control and selected populations (**Table S1**). Raw reads  
999 were filtered to remove remaining adapter sequences and to exclude low quality

1000 positions using cutadapt (v.2.0) (Martin 2011) with options: -a AGATCGGAAGAGC --  
1001 minimum-length 75 -q 20. Filtered reads were then mapped to the repeat-masked  
1002 reference genome (see above), the TE library from deviaTE, *Wolbachia pipientis*,  
1003 *Acetobacter pasteurianus*, and *Lactobacillus brevis* (see above) using STAR (Dobin  
1004 et al. 2013) with options --alignIntronMin 23 --alignIntronMax 268107 --  
1005 outFilterMultimapNmax 10 --outReadsUnmapped FastX --outSAMstrandField  
1006 intronMotif --outSAMtype BAM SortedByCoordinate. Read counts were obtained  
1007 using the command-line version of featureCounts (Liao et al. 2013) with options -t  
1008 exon -g gene\_id --extraAttributes gene\_symbol. We next pre-filtered the read count  
1009 data by excluding all genes and TEs that did not have a sum of 400 counts across all  
1010 80 samples (i.e. on average 5 counts per sample). Five TEs that are not known to  
1011 occur in *D. melanogaster* passed this filter and were excluded. For simplicity, the  
1012 analysis was performed on average read counts from two replicates, as all replicates  
1013 were highly significantly correlated (Pearson's  $r$  ranging from 0.95 to 1, significant after  
1014 Bonferroni correction). To analyze differential expression, we fit two models using read  
1015 counts of genes and TEs with DESeq2 in *R* (Love et al. 2014). First, a full model with  
1016 *Regime* (selected vs control), *Sex* (male vs female), *Age* (young vs old) and all  
1017 interactions were fit. As the sex term was significant for most TEs, we decided to  
1018 analyze males and females separately and by fitting models with *Regime*, *Age* and  
1019 the *Regime x Age* interaction. We obtained  $\log_2$  fold change values for each factor and  
1020 the normalized read counts from DEseq2 for further analysis. To correct for the effect  
1021 of copy number on expression, we divided read counts of TEs by the number of  
1022 insertions observed in each population, assuming that genes and 13 TEs that did not  
1023 pass out filters in the genomic analysis have a single copy in the genome.

1024

## 1025 **Evolution of TE regulation genes**

1026 The list of genes involved in TE regulation consisted of piRNA pathway genes also  
1027 analyzed in Erwin and Blumenstiel 2019 and Elsner et al. 2018, and genes involved  
1028 in heterochromatic and chromatin structure from Lee and Karpen 2017. We further  
1029 added 7 additional genes involved in these functions, and genes annotated to  
1030 "regulation of transposition" (GO:0010528) and "transposition" (GO:0032196)  
1031 according to FlyBase so that we ended up with a total of 96 genes (**Table S11**). We  
1032 then screened the published genomic candidate gene lists from Carnes2015,  
1033 Fabian2018, Hoedjes2019 and Remolina2012 for these genes. We also compared TE

1034 regulation genes to differentially expressed genes from the RNA-seq analysis of  
1035 Carnes2015 (see above). We further obtained normalized microarray expression data  
1036 from Remolina2012 of female flies at 1, 5, 15, 30, and 50 days of age (**Table S1**).  
1037 Notably, the expression data were created from flies at 40 generations of selection  
1038 compared to 50 generations in the genomic analysis. We fit a mixed effects model  
1039 similar to the one used in the original publication with *Age*, *Regime*, and *Age x Regime*  
1040 as fixed and *replication within population-age combination* as random effect. The two  
1041 available tissues (heads and abdomens) were analyzed separately. A gene was  
1042 considered to be differentially expressed if it had an FDR < 0.05 unless otherwise  
1043 stated.

1044

#### 1045 **DATA ACCESSIBILITY**

1046 All data used in this study have been previously published. Accession numbers to the  
1047 raw genomic and transcriptomic data can be found in **Table S1** and in the original  
1048 studies (Remolina et al. 2012; Carnes et al. 2015; Fabian et al. 2018; Hoedjes et al.  
1049 2019). RNA-seq data were obtained directly from the authors. Additional raw data and  
1050 results files on TE abundance, TE positions and frequency differentiation, nucleotide  
1051 diversity, RNA-seq results for genes and TEs, and microarray results are available at:  
1052 *to be made available upon publication*.

1053

#### 1054 **ACKNOWLEDGEMENTS**

1055 We thank Robert Kofler, Andrea Betancourt, Frank Jiggins, Lukas Weilguny and Suse  
1056 Franssen for helpful comments and discussions. This work was supported by the  
1057 Wellcome Trust (WT098565/Z/12/Z to J.M.T. and L.P.), EMBL (H.M.D. and J.M.T.),  
1058 and Comisión Nacional de Investigación Científica y Tecnológica – Government of  
1059 Chile (CONICYT scholarship to M.F.). We are further grateful for financial support from  
1060 the Society for Molecular Biology & Evolution enabling us to present this work at the  
1061 annual meeting (SMBE 2019, Carer travel award & registration award to D.F.).

1062

#### 1063 **REFERENCES**

- 1064 Arkhipova IR. 2018. Neutral theory, transposable elements, and eukaryotic genome  
1065 evolution. *Mol Biol Evol.* 35:1332–1337.
- 1066 Barrón MG, Fiston-Lavier AS, Petrov DA, González J. 2014. Population genomics of  
1067 transposable elements in *Drosophila*. *Annu Rev Genet.* 48:561–581.



- 1068 Bogu GK, Reverter F, Marti-Renom MA, Snyder MP, Guigó R. 2019. Atlas of  
1069 transcriptionally active transposable elements in human adult tissues.  
1070 *unpublished data*. [www.biorxiv.org/content/10.1101/714212v1](http://www.biorxiv.org/content/10.1101/714212v1)
- 1071 Brouha B, Schustak J, Badge RM, Lutz-Prigge S, Farley AH, Moran J V., Kazazian  
1072 HH. 2003. Hot L1s account for the bulk of retrotransposition in the human  
1073 population. *Proc Natl Acad Sci U S A*. 100:5280–5285.
- 1074 Brown EJ, Bachtrog D. 2017. The Y chromosome contributes to sex-specific aging in  
1075 *Drosophila*. *unpublished data*. [www.biorxiv.org/content/10.1101/156042v1](http://www.biorxiv.org/content/10.1101/156042v1)
- 1076 Canela A, Vera E, Klatt P, Blasco MA. 2007. High-throughput telomere length  
1077 quantification by FISH and its application to human population studies. *Proc Natl*  
1078 *Acad Sci U S A*. 104:5300–5305.
- 1079 Carnes MU, Campbell T, Huang W, Butler DG, Carbone MA, Duncan LH, Harbajan  
1080 S V., King EM, Peterson KR, Weitzel A, et al. 2015. The genomic basis of  
1081 postponed senescence in *Drosophila melanogaster*. *PLoS One*. 10:e0138569.
- 1082 Carr M, Bensasson D, Bergman CM. 2012. Evolutionary genomics of transposable  
1083 elements in *Saccharomyces cerevisiae*. *PLoS One*. 7:e50978.
- 1084 Casacuberta E. 2017. *Drosophila*: Retrotransposons making up telomeres. *Viruses*.  
1085 9:E192.
- 1086 De Cecco M, Criscione SW, Peckham EJ, Hillenmeyer S, Hamm EA, Manivannan J,  
1087 Peterson AL, Kreiling JA, Neretti N, Sedivy JM. 2013. Genomes of replicatively  
1088 senescent cells undergo global epigenetic changes leading to gene silencing  
1089 and activation of transposable elements. *Aging Cell*. 12:247–256.
- 1090 De Cecco M, Ito T, Petrashen AP, Elias AE, Skvir NJ, Criscione SW, Caligiana A,  
1091 Broccoli G, Adney EM, Boeke JD, et al. 2019. L1 drives IFN in senescent cells  
1092 and promotes age-associated inflammation. *Nature*. 566:73–78.
- 1093 Chang CH, Chavan A, Palladino J, Wei X, Martins NMC, Santinello B, Chen CC,  
1094 Erceg J, Beliveau BJ, Wu CT, et al. 2019. Islands of retroelements are major  
1095 components of *Drosophila* centromeres. *PLoS Biol*. 17:e3000241.
- 1096 Charlesworth B, Charlesworth D. 1983. The population dynamics of transposable  
1097 elements. *Genet Res*. 42:1–27.
- 1098 Chen H, Zheng X, Xiao D, Zheng Y. 2016. Age-associated de-repression of  
1099 retrotransposons in the *Drosophila* fat body, its potential cause and  
1100 consequence. *Aging Cell*. 15:542–552.
- 1101 Chen H, Zheng X, Zheng Y. 2014. Age-associated loss of lamin-B leads to systemic

- 1102 inflammation and gut hyperplasia. *Cell*. 159:829–843.
- 1103 Cingolani P, Platts A, Wang LL, Coon M, Nguyen T, Wang L, Land SJ, Lu X, Ruden  
1104 DM. 2012. A program for annotating and predicting the effects of single  
1105 nucleotide polymorphisms, SnpEff: SNPs in the genome of *Drosophila*  
1106 *melanogaster* strain w1118; iso-2; iso-3. *Fly (Austin)*. 6:80–92.
- 1107 Cridland JM, Macdonald SJ, Long AD, Thornton KR. 2013. Abundance and  
1108 distribution of transposable elements in two *Drosophila* QTL mapping resources.  
1109 *Mol Biol Evol*. 30:2311–2327.
- 1110 Cui R, Medeiros T, Willemsen D, Leonardo L Iasi, Collier G, Graef M, Reichard M,  
1111 Valenzano D. 2019. Relaxed selection limits lifespan by increasing mutation  
1112 load. *Cell*. 178:385-399.e20.
- 1113 Daborn PJ, Yen JL, Bogwitz MR, Le Goff G, Feil E, Jeffers S, Tijet N, Perry T,  
1114 Heckel D, Batterham P, et al. 2002. A single P450 allele associated with  
1115 insecticide resistance in *Drosophila*. *Science*. 297:2253–2256.
- 1116 Dantzer B, Fletcher QE. 2015. Telomeres shorten more slowly in slow-aging wild  
1117 animals than in fast-aging ones. *Exp Gerontol*. 71:38–47.
- 1118 Deniz Ö, Frost JM, Branco MR. 2019. Regulation of transposable elements by DNA  
1119 modifications. *Nat Rev Genet*. 20:417–431.
- 1120 Dennis S, Sheth U, Feldman JL, English KA, Priess JR. 2012. *C. elegans* germ cells  
1121 show temperature and age-dependent expression of Cer1, a Gypsy/Ty3-related  
1122 retrotransposon. *PLoS Pathog*. 8:e1002591.
- 1123 Dimitri P, Junakovic N. 1999. Revising the selfish DNA hypothesis: New evidence on  
1124 accumulation of transposable elements in heterochromatin. *Trends Genet*.  
1125 15:123–124.
- 1126 Dobin A, Davis CA, Schlesinger F, Drenkow J, Zaleski C, Jha S, Batut P, Chaisson  
1127 M, Gingeras TR. 2013. STAR: Ultrafast universal RNA-seq aligner.  
1128 *Bioinformatics*. 29:15–21.
- 1129 Eisenberg DTA, Hayes MG, Kuzawa CW. 2012. Delayed paternal age of  
1130 reproduction in humans is associated with longer telomeres across two  
1131 generations of descendants. *Proc Natl Acad Sci U S A*. 109:10251–10256.
- 1132 Eisenberg DTA, Kuzawa CW. 2018. The paternal age at conception effect on  
1133 offspring telomere length: Mechanistic, comparative and adaptive perspectives.  
1134 *Philos Trans R Soc B Biol Sci*. 373:pii: 20160442.
- 1135 Elsner D, Meusemann K, Korb J. 2018. Longevity and transposon defense, the case

- 1136 of termite reproductives. *Proc Natl Acad Sci U S A*. 115:5504–5509.
- 1137 Erwin AA, Blumenstiel JP. 2019. Aging in the *Drosophila* ovary: contrasting changes  
1138 in the expression of the piRNA machinery and mitochondria but no global  
1139 release of transposable elements. *BMC Genomics*. 20:305.
- 1140 Everett LJ, Huang W, Zhou S, Carbone MA, Lyman RF, Arya GH, Geisz MS, Ma J,  
1141 Morgante F, Armour G, et al. 2019. Gene expression networks in the *Drosophila*  
1142 genetic reference panel. *unpublished data*.  
1143 [www.biorxiv.org/content/10.1101/816579v1](http://www.biorxiv.org/content/10.1101/816579v1)
- 1144 Fabian D, Flatt T. 2011. The evolution of aging. *Nat Educ Knowl*. 2:9.
- 1145 Fabian DK, Garschall K, Klepsatel P, Santos-Matos G, Sucena É, Kapun M,  
1146 Lemaitre B, Schlötterer C, Arking R, Flatt T. 2018. Evolution of longevity  
1147 improves immunity in *Drosophila*. *Evol Lett*. 2:567–579.
- 1148 Flatt T, Heyland A. 2011. Mechanisms of life history evolution: The genetics and  
1149 physiology of life history traits and trade-offs. *Oxford Univ Press Oxford*.
- 1150 Foley NM, Hughes GM, Huang Z, Clarke M, Jebb D, Whelan C V., Petit EJ, Touzalin  
1151 F, Farcy O, Jones G, et al. 2018. Growing old, yet staying young: The role of  
1152 telomeres in bats' exceptional longevity. *Sci Adv*. 4:eaa0926.
- 1153 Fontana L, Partridge L, Longo VD. 2010. Extending healthy life span—from yeast to  
1154 humans. *Science*. 328:321–326.
- 1155 Gems D, Partridge L. 2013. Genetics of longevity in model organisms: Debates and  
1156 paradigm shifts. *Annu Rev Physiol*. 75:621–644.
- 1157 Goldmann J, Veltman J, Gilissen C. 2019. De novo mutations reflect development  
1158 and aging of the human germline. *Trends Genet*. 35:828–839.
- 1159 Graves JL, Hertweck KL, Phillips MA, Han M V., Cabral LG, Barter TT, Greer LF,  
1160 Burke MK, Mueller LD, Rose MR, et al. 2017. Genomics of parallel experimental  
1161 evolution in *Drosophila*. *Mol Biol Evol*. 34:831–842.
- 1162 Guo C, Jeong HH, Hsieh YC, Klein HU, Bennett DA, De Jager PL, Liu Z, Shulman  
1163 JM. 2018. Tau activates transposable elements in Alzheimer's disease. *Cell*  
1164 *Rep*. 23:2874–2880.
- 1165 Hancks DC, Kazazian HH. 2012. Active human retrotransposons: Variation and  
1166 disease. *Curr Opin Genet Dev*. 22:191–203.
- 1167 Hoedjes KM, van den Heuvel J, Kapun M, Keller L, Flatt T, Zwaan BJ. 2019. Distinct  
1168 genomic signals of lifespan and life history evolution in response to postponed  
1169 reproduction and larval diet in *Drosophila*. *Evol Lett*.

- 1170 Jurka J, Bao W, Kojima KK. 2011. Families of transposable elements, population  
1171 structure and the origin of species. *Biol Direct.* 6:44.
- 1172 Kalendar R, Tanskanen J, Immonen S, Nevo E, Schulman AH. 2000. Genome  
1173 evolution of wild barley (*Hordeum spontaneum*) by BARE-1 retrotransposon  
1174 dynamics in response to sharp microclimatic divergence. *Proc Natl Acad Sci U*  
1175 *S A.* 97:6603–6607.
- 1176 Kaneko H, Dridi S, Tarallo V, Gelfand BD, Fowler BJ, Cho WG, Kleinman ME,  
1177 Ponicsan SL, Hauswirth WW, Chiodo VA, et al. 2011. DICER1 deficit induces  
1178 Alu RNA toxicity in age-related macular degeneration. *Nature.* 471:325–330.
- 1179 Kassiotis G, Stoye JP. 2016. Immune responses to endogenous retroelements:  
1180 Taking the bad with the good. *Nat Rev Immunol.* 16:207–219.
- 1181 Khurana JS, Wang J, Xu J, Koppetsch BS, Thomson TC, Nowosielska A, Li C,  
1182 Zamore PD, Weng Z, Theurkauf WE. 2011. Adaptation to P element transposon  
1183 invasion in *Drosophila melanogaster*. *Cell.* 147:1551–1563.
- 1184 Kofler R. 2019. Dynamics of Transposable Element Invasions with piRNA Clusters.  
1185 *Mol Biol Evol.* 36:1457–1472.
- 1186 Kofler R, Gómez-Sánchez D, Schlötterer C. 2016. PoPoolationTE2: Comparative  
1187 population genomics of transposable elements using pool-seq. *Mol Biol Evol.*  
1188 33:2759–2764.
- 1189 Kofler R, Nolte V, Schlötterer C. 2015. Tempo and mode of transposable element  
1190 activity in *Drosophila*. *PLoS Genet.* 11:e1005406.
- 1191 Kofler R, Orozco-terWengel P, de Maio N, Pandey RV, Nolte V, Futschik A, Kosiol C,  
1192 Schlötterer C. 2011. Popoolation: a toolbox for population genetic analysis of  
1193 next generation sequencing data from pooled individuals. *PLoS One.* 6:e15925.
- 1194 Kofler R, Senti KA, Nolte V, Tobler R, Schlötterer C. 2018. Molecular dissection of a  
1195 natural transposable element invasion. *Genome Res.* 28:824–835.
- 1196 de Koning APJ, Gu W, Castoe TA, Batzer MA, Pollock DD. 2011. Repetitive  
1197 elements may comprise over two-thirds of the human genome. *PLoS Genet.*  
1198 7:e1002384.
- 1199 Kreiner JM, Wright SI. 2018. A less selfish view of genome size evolution in maize.  
1200 *PLoS Genet.* 14:e1007249.
- 1201 Krug L, Chatterjee N, Borges-Monroy R, Hearn S, Liao WW, Morrill K, Prazak L,  
1202 Rozhkov N, Theodorou D, Hammell M, et al. 2017. Retrotransposon activation  
1203 contributes to neurodegeneration in a *Drosophila* TDP-43 model of ALS. *PLoS*

- 1204        *Genet.* 13:e1006635.
- 1205    Kuhn A, Ong YM, Cheng C-Y, Wong TY, Quake SR, Burkholder WF. 2014. Linkage  
1206        disequilibrium and signatures of positive selection around LINE-1  
1207        retrotransposons in the human genome. *Proc Natl Acad Sci U S A.* 111:8131–  
1208        8136.
- 1209    Lee YCG, Karpen GH. 2017. Pervasive epigenetic effects of *Drosophila* euchromatic  
1210        transposable elements impact their evolution. *Elife.* 6:pii: e25762.
- 1211    Lerat E, Goubert C, Guirao-Rico S, Merenciano M, Dufour AB, Vieira C, González J.  
1212        2019. Population-specific dynamics and selection patterns of transposable  
1213        element insertions in European natural populations. *Mol Ecol.* 28:1506–1522.
- 1214    Li H, Durbin R. 2009. Fast and accurate short read alignment with Burrows-Wheeler  
1215        transform. *Bioinformatics.* 25:1754–1760.
- 1216    Li H, Handsaker B, Wysoker A, Fennell T, Ruan J, Homer N, Marth G, Abecasis G,  
1217        Durbin R. 2009. The Sequence Alignment/Map format and SAMtools.  
1218        *Bioinformatics.* 25:2078–2079.
- 1219    Li W, Prazak L, Chatterjee N, Grüninger S, Krug L, Theodorou D, Dubnau J. 2013.  
1220        Activation of transposable elements during aging and neuronal decline in  
1221        *Drosophila*. *Nat Neurosci.* 16:529–531.
- 1222    Li ZW, Hou XH, Chen JF, Xu YC, Wu Q, Gonzalez J, Guo YL. 2018. Transposable  
1223        elements contribute to the adaptation of *Arabidopsis thaliana*. *Genome Biol*  
1224        *Evol.* 10:2140–2150.
- 1225    Liao Y, Smyth GK, Shi W. 2013. FeatureCounts: an efficient general-purpose read  
1226        summarization program. *Bioinformatics.* 30:923–930.
- 1227    Lippman Z, Martienssen R. 2004. The role of RNA interference in heterochromatic  
1228        silencing. *Nature.* 431:364–370.
- 1229    López-Otín C, Blasco MA, Partridge L, Serrano M, Kroemer G. 2013. The hallmarks  
1230        of aging. *Cell.* 153:1194–1217.
- 1231    Love MI, Huber W, Anders S. 2014. Moderated estimation of fold change and  
1232        dispersion for RNA-seq data with DESeq2. *Genome Biol.* 15:550.
- 1233    Luckinbill LR, Arking R, Clare MJ. 1984. Selection for delayed senescence in  
1234        *Drosophila melanogaster*. *Evolution.* 38:996–1003.
- 1235    Magwire MM, Bayer F, Webster CL, Cao C, Jiggins FM. 2011. Successive increases  
1236        in the resistance of *Drosophila* to viral infection through a transposon insertion  
1237        followed by a duplication. *PLoS Genet.* 7:e1002337.

- 1238 Martienssen R, Moazed D. 2015. RNAi and heterochromatin assembly. *Cold Spring*  
1239 *Harb Perspect Biol.* 7:a019323.
- 1240 Martin M. 2011. Cutadapt removes adapter sequences from high-throughput  
1241 sequencing reads. *EMBnet.journal.* 17:10–12.
- 1242 Maxwell PH, Burhans WC, Curcio MJ. 2011. Retrotransposition is associated with  
1243 genome instability during chronological aging. *Proc Natl Acad Sci U S A.*  
1244 108:20376–20381.
- 1245 May CM, van den Heuvel J, Doroszuk A, Hoedjes KM, Flatt T, Zwaan BJ. 2019.  
1246 Adaptation to developmental diet influences the response to selection on age at  
1247 reproduction in the fruit fly. *J Evol Biol.* 32:425–437.
- 1248 McClintock B. 1950. The origin and behavior of mutable loci in maize. *Proc Natl*  
1249 *Acad Sci U S A.* 36:344–355.
- 1250 Michalak P, Kang L, Sarup PM, Schou MF, Loeschcke V. 2017. Nucleotide diversity  
1251 inflation as a genome-wide response to experimental lifespan extension in  
1252 *Drosophila melanogaster.* *BMC Genomics.* 18:84.
- 1253 Mori MA, Raghavan P, Thomou T, Boucher J, Robida-Stubbs S, MacOtela Y,  
1254 Russell SJ, Kirkland JL, Blackwell TK, Kahn CR. 2012. Role of microRNA  
1255 processing in adipose tissue in stress defense and longevity. *Cell Metab.*  
1256 16:336–3347.
- 1257 Pan H, Finkel T. 2017. Key proteins and pathways that regulate lifespan. *J Biol*  
1258 *Chem.* 292:6452–6460.
- 1259 Petrov DA, Fiston-Lavier AS, Lipatov M, Lenkov K, González J. 2011. Population  
1260 genomics of transposable elements in *Drosophila melanogaster.* *Mol Biol Evol.*  
1261 28:1633–1644.
- 1262 Piper MDW, Selman C, McElwee JJ, Partridge L. 2008. Separating cause from  
1263 effect: How does insulin/IGF signalling control lifespan in worms, flies and mice?  
1264 *J Intern Med.* 263:179–191.
- 1265 Prudencio M, Gonzales PK, Cook CN, Gendron TF, Daugherty LM, Song Y, Ebbert  
1266 MTW, van Blitterswijk M, Zhang YJ, Jansen-West K, et al. 2017. Repetitive  
1267 element transcripts are elevated in the brain of C9orf72 ALS/FTLD patients.  
1268 *Hum Mol Genet.* 26:3421–3431.
- 1269 Quesneville H, Bergman CM, Andrieu O, Autard D, Nouaud D, Ashburner M,  
1270 Anxolabehere D. 2005. Combined evidence annotation of transposable  
1271 elements in genome sequences. *PLoS Comput Biol.* 1:166–175.

- 1272 Raices M, Maruyama H, Dillin A, Kariseder J. 2005. Uncoupling of longevity and  
1273 telomere length in *C. elegans*. *PLoS Genet.* 1:e30.
- 1274 Rech GE, Bogaerts-Márquez M, Barrón MG, Merenciano M, Villanueva-Cañas JL,  
1275 Horváth V, Fiston-Lavier AS, Luyten I, Venkataram S, Quesneville H, et al.  
1276 2019. Stress response, behavior, and development are shaped by transposable  
1277 element-induced mutations in *Drosophila*. *PLoS Genet.* 15:e1007900.
- 1278 Remolina S, Chang P, Leips J. 2012. Genomic basis of aging and life history  
1279 evolution in *Drosophila melanogaster*. *Evolution.* 66:3390–3403.
- 1280 Rose M. 1984. Laboratory evolution of postponed senescence in *Drosophila*  
1281 *melanogaster*. *Evolution.* 38:1004–1010.
- 1282 Sasani TA, Pedersen BS, Gao Z, Baird L, Przeworski M, Jorde LB, Quinlan AR.  
1283 2019. Large, three-generation human families reveal post-zygotic mosaicism  
1284 and variability in germline mutation accumulation. *Elife.* 8:pii: e46922.
- 1285 Schnable PS, Ware D, Fulton RS, Stein JC, Wei F, Pasternak S, Liang C, Zhang J,  
1286 Fulton L, Graves TA, et al. 2009. The B73 maize genome: Complexity, diversity,  
1287 and dynamics. *Science.* 326:1112–1115.
- 1288 Smit A, Hubley R, Green P. 1996. RepeatMasker Open-3.0. [www.repeatmasker.org](http://www.repeatmasker.org)
- 1289 Solyom S, Ewing AD, Rahrmann EP, Doucet T, Nelson HH, Burns MB, Harris RS,  
1290 Sigmon DF, Casella A, Erlanger B, et al. 2012. Extensive somatic L1  
1291 retrotransposition in colorectal tumors. *Genome Res.* 22:2328–2338.
- 1292 Sturm Á, Ivics Z, Vellai T. 2015. The mechanism of ageing: Primary role of  
1293 transposable elements in genome disintegration. *Cell Mol Life Sci.* 72:1839–  
1294 1847.
- 1295 Volkman HE, Stetson DB. 2014. The enemy within: Endogenous retroelements and  
1296 autoimmune disease. *Nat Immunol.* 15:415–422.
- 1297 Walter MF, Biessmann MR, Benitez C, Török T, Mason JM, Biessmann H. 2007.  
1298 Effects of telomere length in *Drosophila melanogaster* on life span, fecundity,  
1299 and fertility. *Chromosoma.* 116:41–51.
- 1300 Wang M, Zhao Y, Zhang B. 2015. Efficient test and visualization of multi-set  
1301 intersections. *Sci Rep.* 5:16923.
- 1302 Weilguny L, Kofler R. 2019. DeviaTE: Assembly-free analysis and visualization of  
1303 mobile genetic element composition. *Mol Ecol Resour.* 19:1346–1354.
- 1304 Whittemore K, Vera E, Martínez-Nevado E, Sanpera C, Blasco MA. 2019. Telomere  
1305 shortening rate predicts species life span. *Proc Natl Acad Sci U S A.*

1306 116:15122–15127.

1307 Wood JG, Helfand SL. 2013. Chromatin structure and transposable elements in  
1308 organismal aging. *Front Genet.* 4:274.

1309 Wood JG, Jones BC, Jiang N, Chang C, Hosier S, Wickremesinghe P, Garcia M,  
1310 Hartnett DA, Burhenn L, Neretti N, et al. 2016. Chromatin-modifying genetic  
1311 interventions suppress age-associated transposable element activation and  
1312 extend life span in *Drosophila*. *Proc Natl Acad Sci U S A.* 113:11277–11282.

1313

1314

1315

1316

1317

1318

1319

1320

1321

1322

1323

1324

1325

1326

1327

1328

1329

1330

1331

1332

1333

1334

1335

1336

1337

1338

1339



1340 **FIGURE LEGENDS**

1341 **Figure 1. Difference in TE abundance between regimes.** Upper row:  $\delta$ insertions (Y-  
1342 axis) were obtained by subtracting the average genomic insertions of the controls from  
1343 the selected populations. Bottom row:  $\log_2$  fold change between selected and control  
1344 populations. The dashed line indicates no difference between regimes.  $>0$  denote TEs  
1345 with a larger abundance in selected populations, while  $<0$  TEs with more insertions in  
1346 controls. TE subclasses are given in different colors. Selected flies had more genomic  
1347 insertions than controls for most TE families (also see Table 1).

1348

1349 **Figure 2. Differences in average TE frequency.** Average TE frequency from the  
1350 South African population separated into C>S (blue) and S>C TEs (red) are shown on  
1351 the Y-axis. Differences are shown considering all C>S and S>C TEs (“All”) or only the  
1352 top 10 TEs with the biggest differences in  $\log_2$  FC of insertions (“Top 10”). t-tests were  
1353 used to assess statistical significance. ns, not significant; \*  $P < 0.05$ ; \*\*\*  $P < 0.001$ .

1354

1355 **Figure 3. Selection on TE abundance and insertions.** (A) Sharing of TEs with  
1356 significant differences in abundance between regimes of each study. S>C and C>S  
1357 denote TEs with a higher abundance in selected or control populations, respectively.  
1358 Red bars indicate a significant overlap at  $P < 0.05$ . (B) Boxplots of the number of  
1359 genomic insertions relative to the total genomic content of the 2 significantly shared  
1360 C>S TEs. (C) Genome-wide differentiation in TE insertion frequency between selected  
1361 and control populations in Fabian2018 and (D) Hoedjes2019. Every point indicates  
1362 the  $-\log_{10}$  P-value of a TE insertion across chromosomal arms (alternating black and  
1363 grey color). The solid orange line corresponds to the Bonferroni cut-off at  $\alpha = 0.05$ .  
1364 Red points denote TEs with a significantly higher frequency in selected relative to  
1365 control populations. More details including exact positions, frequency and annotation  
1366 of candidate TE insertions can be found in **Table S5**.

1367

1368 **Figure 4. Multiple factors influence TE expression.** (A) Proportions of differentially  
1369 expressed TEs at adjusted  $P < 0.05$  and directionality relative to 123 TEs with  
1370 detectable expression for factors from statistical models on pre-filtered read counts in  
1371 DESeq2 (also see **Table S7**). “Sex” refers to the results of the full model including Sex  
1372 (M, males; F, females), Age (young; old), Regime (C, control; S, selected), and all

1373 interactions. “Regime”, “Age” and “RxA” (i.e. *Regime x Age* interaction) refer to results  
1374 from model fits with males and females separately analyzed. The absolute number of  
1375 TEs for factor levels are given above or below bars. (B) Log<sub>2</sub> fold change of regime  
1376 (selected vs control) and (C) age (young vs old) for males and females. Colors  
1377 designate TEs significant only in males (blue), or females (red), or shared between  
1378 both sexes (orange). Not significant TEs are in grey. (D and E) Log<sub>2</sub> fold changes  
1379 across regime against age differences in males and females. Colors designate TEs  
1380 significant only for regime (blue), or age (red), or for both factors (orange). Not  
1381 significant TEs are in grey. (F) Normalized expression counts were significantly  
1382 correlated to the number of insertions in the genome. Expression values for each TE  
1383 were averaged across all conditions (sex, age, regime). Separating samples into  
1384 different conditions resulted in similar significant correlation coefficients (**Table S8**).  
1385 Colors correspond to TEs with a significantly higher genomic abundance in selected  
1386 (red) or control populations (blue). (B to E): r, Pearson’s correlation coefficient; (F): r,  
1387 Spearman’s correlation coefficient; \* P < 0.05, \*\*\* P < 0.0001.

1388

1389

1390

1391

1392

1393

1394

1395

1396

1397

1398

1399

1400

1401

1402

1403

1404

1405

1406

1407 **TABLES**

1408

1409 **Table 1.** Number of detected and significant TE families with percentage of TEs more  
1410 abundant in selected (S>C) or controls (C>S) or not different between regimes (n.s.)  
1411 from models analyzing studies independently or combined.

1412

| <b>Study</b>          | <b>N</b> | <b>N (sign.)<sup>a</sup></b>                   | <b>S&gt;C</b> | <b>C&gt;S</b> | <b>n.s.</b> |
|-----------------------|----------|------------------------------------------------|---------------|---------------|-------------|
| <b>Carnes2015</b>     | 112      | 107                                            | 77%           | 19%           | 4%          |
| <b>Fabian2018</b>     | 110      | 85                                             | 46%           | 31%           | 33%         |
| <b>Hoedjes2019</b>    | 115      | 94                                             | 58%           | 24%           | 18%         |
| <b>Remolina2012</b>   | 110      | 76                                             | 57%           | 12%           | 31%         |
| <b>Combined Model</b> | 103      | Regime: 41<br>Study: 101<br>Study x Regime: 65 | 33%           | 7%            | 60%         |

1413 <sup>a</sup>Significant after Bonferroni correction at  $\alpha=0.01$  in single studies or FDR<0.05 in combined  
1414 model.

1415

1416

1417

1418

1419

1420

1421

1422

1423

1424

1425

1426

1427

1428

1429

1430

1431

1432 **Table 2.** TE regulation genes identified by each study as genetically differentiated  
 1433 candidate genes for lifespan combined with differential expression in Carnes2015 and  
 1434 Remolina2012 (see **Table S11** for a full summary of all 96 genes).  
 1435

| Gene                | Type               | Genetic Differentiation |             |                |               | Differential expression              |     |          |
|---------------------|--------------------|-------------------------|-------------|----------------|---------------|--------------------------------------|-----|----------|
|                     |                    | Carnes 2015             | Fabian 2018 | Hoedjes 2019   | Remolina 2012 | Direction of Expression <sup>a</sup> | Sex | Study    |
| <i>E2f1</i>         | epigenetic         | ✓                       | ✓           | -              | -             | Old>Young                            | M   | Carnes   |
| <i>Hsp83</i>        | transposition      | ✓                       | -           | -              | ✓             | Old>Young/RxA                        | M   | Carnes   |
| <i>csul</i>         | piRNA              | ✓                       | -           | -              | -             | Old>Young                            | M   | Carnes   |
| <i>fs(1)Yb</i>      | piRNA              | ✓                       | -           | -              | -             | -                                    | -   | -        |
| <i>G9a</i>          | epigenetic         | ✓                       | -           | -              | -             | Old>Young                            | M   | Carnes   |
| <i>nub</i>          | epigenetic         | ✓                       | -           | -              | -             | Old>Young                            | M   | Carnes   |
| <i>piwi</i>         | epigenetic & piRNA | ✓                       | -           | -              | -             | S>C                                  | F   | Carnes   |
| <i>Su(var)2-HP2</i> | epigenetic         | ✓                       | -           | -              | -             | Old>Young                            | M   | Carnes   |
| <i>tej</i>          | piRNA              | ✓                       | -           | -              | -             | Old>Young/RxA                        | F   | Carnes   |
| <i>wapl</i>         | epigenetic         | ✓                       | -           | -              | -             | Old>Young                            | F   | Remolina |
| <i>tj</i>           | piRNA              | -                       | ✓           | -              | -             | Young>Old/RxA                        | F   | Carnes   |
| <i>vas</i>          | piRNA              | -                       | ✓           | -              | -             | Old>Young                            | F   | Remolina |
| <i>del</i>          | piRNA              | -                       | -           | ✓              | -             | Old>Young                            | F   | Remolina |
| <i>Hen1</i>         | piRNA              | -                       | -           | ✓              | -             | C>S/Old>Young/RxA                    | F   | Carnes   |
| <i>kis</i>          | epigenetic         | -                       | -           | ✓              | -             | Old>Young                            | M   | Carnes   |
| <i>mino</i>         | piRNA              | -                       | -           | ✓              | -             | Young>Old/RxA                        | F   | Carnes   |
| <i>Nbr</i>          | piRNA              | -                       | -           | ✓ <sup>b</sup> | -             | C>S                                  | M&F | Carnes   |
| <i>qin</i>          | piRNA              | -                       | -           | ✓              | -             | Old>Young/RxA                        | M   | Carnes   |
| <i>Su(var)3-7</i>   | epigenetic         | -                       | -           | ✓              | -             | Old>Young                            | F   | Remolina |
| <i>AGO3</i>         | piRNA              | -                       | -           | -              | ✓             | Old>Young                            | M&F | Carnes   |
| <i>armi</i>         | piRNA              | -                       | -           | -              | ✓             | RxA                                  | F   | Carnes   |
| <i>CG8108</i>       | epigenetic         | -                       | -           | -              | ✓             | -                                    | -   | -        |
| <i>moon</i>         | piRNA              | -                       | -           | -              | ✓             | Old>Young                            | F   | Remolina |
| <i>nos</i>          | piRNA              | -                       | -           | -              | ✓             | -                                    | -   | -        |
|                     |                    |                         |             |                |               | C>S                                  | M   | Carnes   |
|                     |                    |                         |             |                |               | Old>Young                            | F   | Remolina |

1436 <sup>a</sup>Padj.<0.05 for Age, Regime and interaction of both (RxA), where ">" indicates larger. <sup>b</sup>P-element  
 1437 frequency divergence found in the present study.

1438  
 1439  
 1440  
 1441  
 1442

1443 **FIGURE 1**

1444

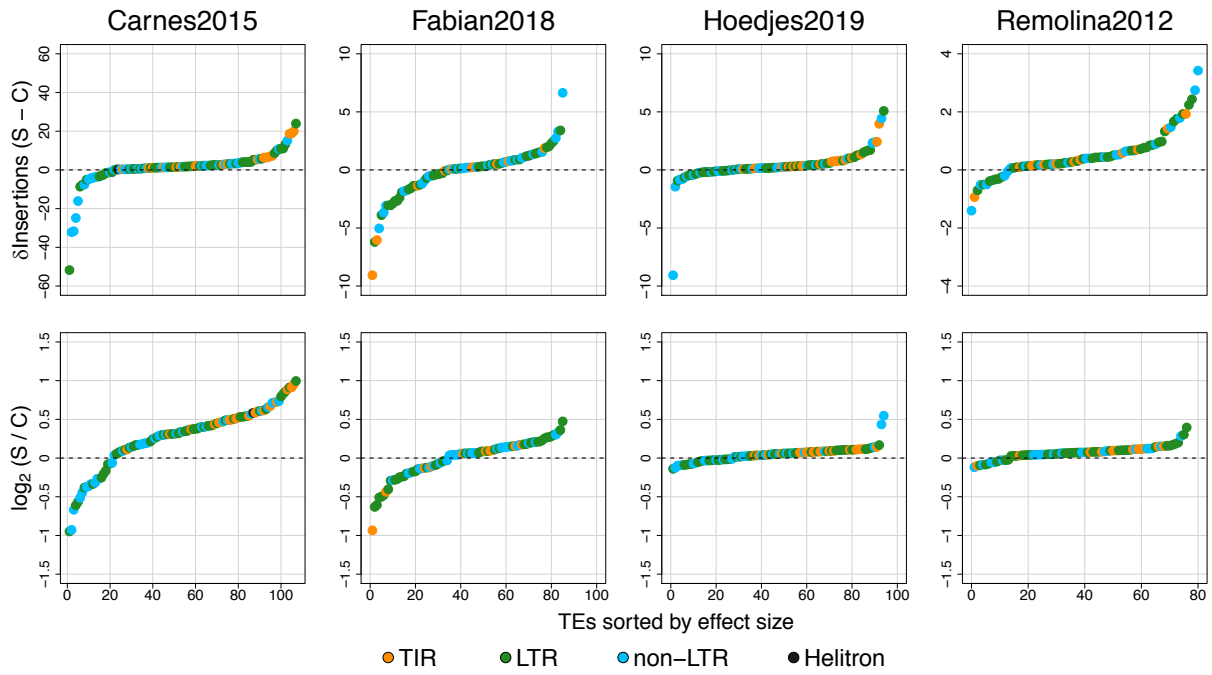

1445

1446

1447

1448

1449

1450

1451

1452

1453

1454

1455

1456

1457

1458

1459

1460

1461

1462

1463

1464

1465 **FIGURE 2**

1466

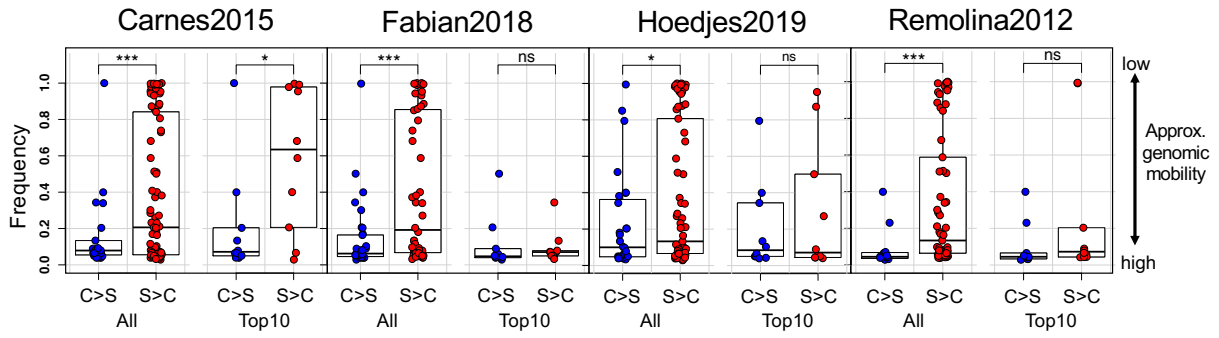

1467

1468

1469

1470

1471

1472

1473

1474

1475

1476

1477

1478

1479

1480

1481

1482

1483

1484

1485

1486

1487

1488

1489

1490

1491

1492

1493 **FIGURE 3**

1494

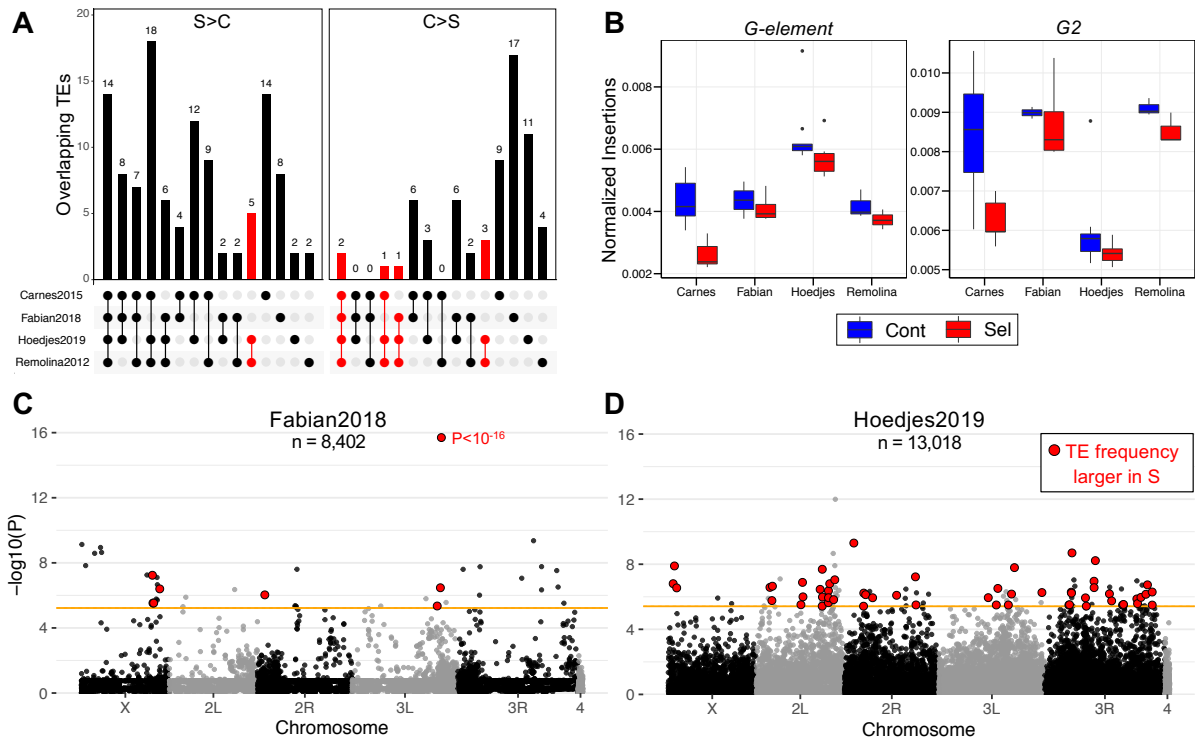

1495

1496

1497

1498

1499

1500

1501

1502

1503

1504

1505

1506

1507

1508

1509

1510

1511

1512

1513

1514 **FIGURE 4**

1515

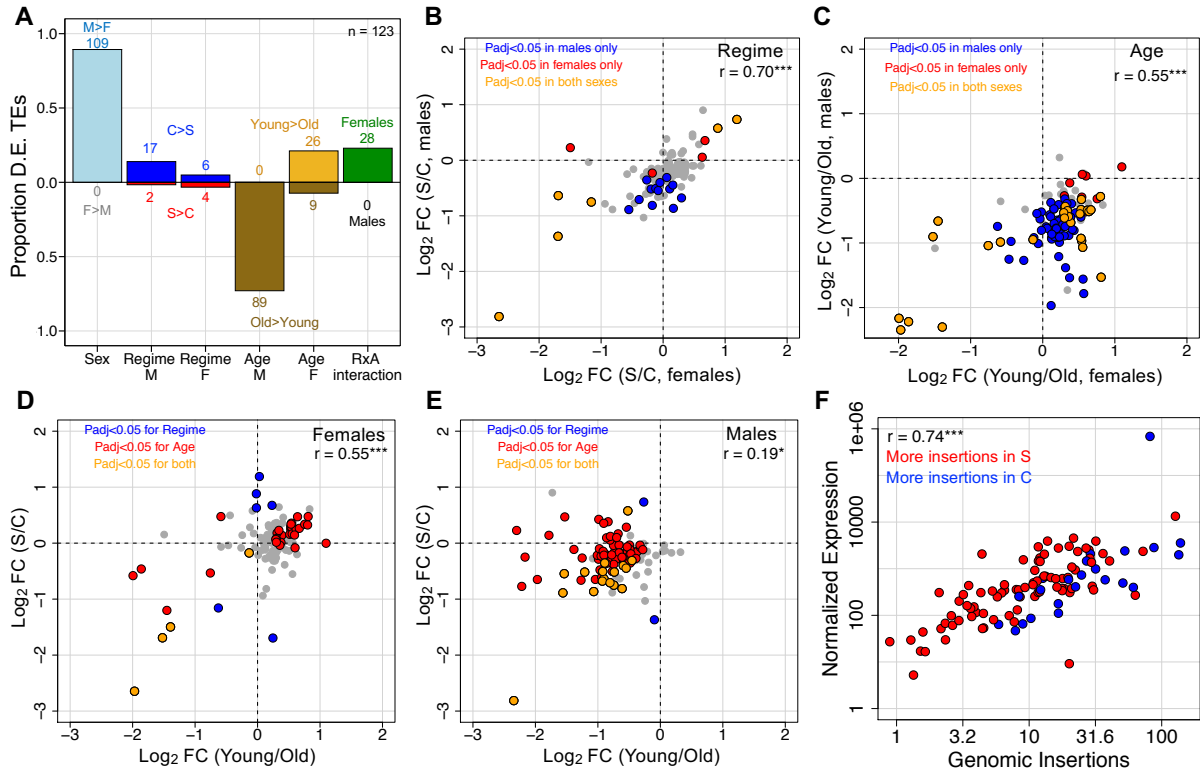

1516
